# Supplementary material for: A potential therapeutic approach for gastric cancer: inhibition of LACTB transcript 1
Source: publisher site journal article supplement (doi:10.18632/aging.205345), 2023-12-26
Supplement: Supplementary file [file aging-v15i24-205345-supplementary-material-SD1.pdf]

## SUPPLEMENTARY FIGURE

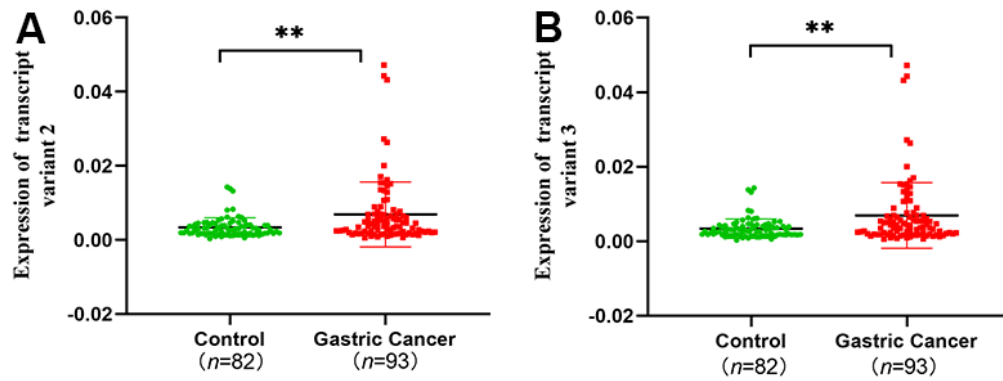

**Supplementary Figure 1.** (A) Expression level of LACTB transcript 2 in venous peripheral blood of gastric cancer patients; (B) Expression level of LACTB transcript 3 in venous peripheral blood of gastric cancer patients. \*\* $P < 0.01$  vs Control.
