# Supplementary material for: A potential therapeutic approach for gastric cancer: inhibition of LACTB transcript 1
Source: Aging (Albany NY). 2023 Dec 26;15(24):15213–27. doi: 10.18632/aging.205345 (PMC10781463; doi:10.18632/aging.205345)
Supplement: Supplementary Table 1 [file aging-15-205345-s002.xlsx]

## Sheet: Sheet1
Supplementary Table 1. The clinical information of 93 patients.
Serial Number	gender	age	height(cm)	weight(kg)	BMI	Smoking situation(0=no;1=yes)	Pathological type	position	clinical stages
C	male	62	163	51	19.1953	0	Adenocarcinoma of the gastric antrum	Gastric antrum
C1	female	44	158	57	22.8329	0	Antral hypoadhesion carcinoma	Gastric antrum
C17	male	77	160	48	18.75	0	Adenocarcinoma of the gastric horn	Gastric horn	ypT4aN1M0/IIIA
C19	male	63	164	48	17.8465	0	Gastric cancer, poorly differentiated adenocarcinoma with seminal vesicle metastasis	Gastric body
G22	male	53	156	45	18.4911	1	Adenocarcinoma of gastric cancer	Gastric body	cT4bN+M1/IVb
G25	female	49	155	55	22.8928	0	Adenocarcinoma of the stomach
G27	male	54	145	60	28.5375	1	Adenocarcinoma of the stomach	Gastric antrum
G28	male	74	165	50	18.3655	1	Adenocarcinoma of the gastric antrum
G29	female	57	157	39	15.8221	0	Fundic small curvature ulcerative poorly differentiated adenocarcinoma containing ring cell components	Small curved side of the fundus
G4	female	71	158	51	20.4294	0	Hypodifferentiated adenocarcinoma of the gastric body and antrum with multiple bone metastases	Gastric body, gastric depression	IV
G7	female	76	162	48	18.2899	1	Adenocarcinoma of the gastric antrum	Gastric antrum
P22	male	69	167	58	20.7967	0	Poorly differentiated adenocarcinoma of the antrum	Gastric antrum	IIIA
P24	male	67	168	88	31.1791	1	Adenocarcinoma of the stomach		IIIC
T1	male	51	175	59	19.2653	1	Tubular adenocarcinoma ulcerative type	Distal stomach small curvature of the stomach	pT3N2M0/III
T2	male	68	150	59	26.2222	1	Gastric hypomoderately differentiated tubular adenocarcinoma	Gastric body	pT3N3aM1/IV
T3	female	64	150	62	27.5556	0	Curvature adenocarcinoma of the stomach	Small curvature of the stomach	pT4aN3M0/IIIc
T4	female	50	155	45	18.7305	0	Poorly differentiated adenocarcinoma in the stomach	Gastric body	ypT2N0M0/Ib
T6	male	50	164	63	23.4236	1	Adenocarcinoma of the gastric body of the antrum	Antrum gastric body	cTxN+M1/IV
T7	female	44	160	45	17.5781	0	Gastric cancer, poorly differentiated adenocarcinoma	Gastric antrum	pT4aN3aM0/G3IIIc
W115	male	51	166	68	24.677	1	Adenocarcinoma of the stomach
W116	male	64	166	47	17.0562	1	Poorly differentiated adenocarcinoma in the stomach	Gastric body	II B
W120	male	64	178	74	23.3556	1	Poorly differentiated adenocarcinoma of the stomach	Gastric Body - Gastroph
W121	male	65	156	54	22.1893	1	Poorly differentiated adenocarcinoma of the antrum	Gastric antrum	III
W122	male	64	176	71	22.921	0	Adenocarcinoma of the gastric antrum	Gastric antrum
W144	male	67	168	75	26.5731	1	Adenocarcinoma of the gastric antrum
W156	male	60	168	69	24.4473	1	Fundic adenocarcinoma	Fundus
W16	female	58	150	45	20	0	Adenocarcinoma of the stomach
W167	female	81	154	40	16.8663	0	Gastric cancer with pyloric obstruction	Gastric antrum
W168	male	46	168	46	16.2982		Poorly differentiated adenocarcinoma of the stomach	Fundus - body of the stomach
W169	female	71	155	56	23.3091	0	Adenocarcinoma of the gastric antrum	Gastric antrum
W17	female	66	161	52	20.061	0	Poorly differentiated adenocarcinoma of the stomach
W18	male	71	176	66.4	21.436	0	Poorly differentiated adenocarcinoma of the antrum
W181	male	49	185	72.5	21.1833	0	Adenocarcinoma of the stomach
W184	male	72	160	50	19.5312	1	Adenocarcinoma of the stomach body	Gastric body	IA
W185	male	64	170	70	24.2215	0	Poorly differentiated adenocarcinoma of the antrum	Gastric antrum
W186	male	61	150	50	22.2222	1	Adenocarcinoma of the gastric horn - ring cell carcinoma	Gastric horn	IA
W187	male	51	172	57	19.2672	0	Poorly differentiated adenocarcinoma of the stomach
W188	male	32	160	63	24.6094	0	Poorly differentiated adenocarcinoma of the antrum	Gastric antrum
W189	male	69	165	57	20.9366	0	Hypo-moderately differentiated adenocarcinoma in the phallic region (20% of Signet ring cell carcinoma)	Prepyloric area	IA
W192	female	73	150	52.5	23.3333	0	Adenocarcinoma of the gastric body of the antrum	Antrum gastric body
W204	male	44	156	57	23.4221	1	Poorly differentiated adenocarcinoma of the antrum	Gastric antrum
W205	male	47	163	49	18.4425	1	Adenocarcinoma of the gastric antrum	Gastric antrum	IIIB
W25	female	58	150	45	20	0	Adenocarcinoma of the stomach
W26	female	51	150	55	24.4444	0	Adenocarcinoma of the gastric horn
W27	male	43	175	65	21.2245	0	Poorly differentiated adenocarcinoma of the gastric body	Gastric body	ypT4bN1M0 III
W92	male	63	170	76	26.2976	0	Poorly differentiated adenocarcinoma of the antrum	Gastric antrum
Z22	male	80	176	71	22.921	0	Scarring cell carcinoma of the gastric horn	Gastric antrum	IV
Z23	female	61	155	57	23.7253	0	Adenocarcinoma of the stomach	Small curved side of the stomach body	cT3-4N+M1/4
Z24	male	68	170	59	20.4152	0	Scarring cell carcinoma of the gastric horn	Gastric horn	pT1N0M0
Z25	male	53	171	59	20.1771	1	Adenocarcinoma of gastric cancer	Fundus	pT4bN3bM0/IIIC
Z26	male	53	166	65	23.5883	0	Antrum cancer	Gastric antrum	ypT4aN1Mo ⅢA
Z27	male	70	171	77	26.3329	1	Adenocarcinoma of the stomach body	Gastric body	pT3N1M0/IIB
Z29	male	52	165	57	20.9366	1	Antral adenocarcinoma, containing ring cell components	Gastric antrum	pT1bN0M0 G3/IA
Z30	male	30	163	57	21.4536	0	Adenocarcinoma of the stomach body	Gastric body
Z31	female	48	159	65	25.711	0	Poorly differentiated adenocarcinoma of the upper part of the stomach	Gastric body	ypT4aN1M0/IIIA
Z32	female	73	152	63.5	27.4844	0	Adenocarcinoma of the gastric antrum	Gastric antrum	ypT3N1M0/II
Z33	male	61	155	50	20.8117	1	Gastric antral adenocarcinoma, tubular adenocarcinoma	Gastric antrum	pT4aN0M0/IIB
Z34	male	60	160	62	24.2187	1	Poorly differentiated adenocarcinoma of gastric horns	Gastric horn	II B
Z35	female	66	155	53	22.0604	0	Antrum cancer	Gastric antrum	III
Z36	male	64	170	55	19.0311	0	Poorly differentiated adenocarcinoma of the antrum	Gastric antrum	pT3-4aN+M1/IV
Z37	male	61	160	62	24.2187	1	Malignant tumors of the gastric cardia	Gastric cardia	pT4aN3M0
Z38	female	71	150	56	24.8889	0	Adenocarcinoma of the gastric body with transverse mesangial invasion	Gastric body	pT4N2M0/IIIB
Z40	female	71	158	59	23.634	0	Antrum cancer	Gastric antrum	pT1N0M0/IA
Z41	male	56	172	59.3	20.0446	0	Tubular adenocarcinoma of the stomach with low differentiation	stomach wall	ypT3N1M0/IIIB
Z42	male	43	170	59	20.4152	1	Adenocarcinoma of the gastric antrum	Gastric antrum	IA
Z43	male	56	170	71	24.5675	1	Fundic cardia adenocarcinoma, perigastric and retroperitoneal lymph node metastasis	Fundic cardia	cT3-4N+M1/IVa
Z45	male	49	164	55	20.4491	0	Gastric cancer, hypoadhesion carcinoma, ring cell adenocarcinoma, invasion of the stomach wall	Full thickness of the stomach wall	pT1N0M0
Z48	male	56	172	59.5	20.1122	1	Adenocarcinoma of the gastric horn		ⅢA
Z49	male	67	165	67	24.6097	1	Adenocarcinoma of the gastric horn	Gastric horn	pT4aN3aM0/IIIB
Z50	male	54	160	55	21.4844	1	Gastric small curvature adenocarcinoma	Small curved side of the stomach body
Z52	male	72	172	62	20.9573	0	Antral cancer with abdominal lymph node liver metastasis	Gastric antrum	pT4aN0M0/IIB
Z53	male	57	160	56	21.875	0	Adenocarcinoma of the stomach and stomach horns	Gastric body	pT4aN2M0/III
Z54	female	71	150	56	24.8889	0	Moderate-poorly differentiated adenocarcinoma	Gastric body	pT4aN3M0
Z55	female	53	150	62	27.5556	0	Adenocarcinoma of the gastric horn antrum	Gastric horn antrum	pT3N3aMO IIIB
Z56	male	61	160	62	24.2187	1	Malignant tumors of the stomach	The full thickness of the stomach wall and the surrounding adipose tissue	ypT3N1M0/IIIB
Z57	male	61	160	62	24.2187	1	Malignant tumors of the stomach	The full thickness of the stomach wall and the surrounding adipose tissue	cT3-4N+M1/IVa
Z58	male	77	160	48	18.75	0	Adenocarcinoma of the gastric horn	Gastric horn	ypT3N1M0/IIIB
Z59	male	58	150	50	22.2222	1	Adenocarcinoma of the stomach
Z60	male	50	175	65	21.2245	1	Antral adenocarcinoma, which invades the entire thickness of the stomach wall	Gastric antrum	ypT4aN3aM0/IIIc
Z61	male	47	170	55	19.0311	1	Adenocarcinoma of the stomach		pT4N2M0/IIIB
Z62	male	53				0	Adenocarcinoma of the gastric horn		pT4aN3M0
Z63	male	80	161	55	21.2183	0	Adenocarcinoma of the whole stomach		cTxbN+M0/Gx II-IIIb
Z64	male	73	163	50.5	19.0071	1	Adenocarcinoma of the stomach	Gastric body	ypT4aN3aM0/IIIc
Z65	male	65				1	Malignant tumors of the stomach		cT4bNxM1/4
Z66	male	67	165	55	20.202	1	Adenocarcinoma of the stomach		pT3N3aM1/IV
Z67	male	64	160	52.5	20.5078	1	Adenocarcinoma of the gastric horn	Gastric horn	ypT2N0M0/Ib
Z68	male	74	168	70	24.8016	0	Adenocarcinoma of the stomach
Z73	female	66	144	41	19.7724	0	Adenocarcinoma of the gastric antrum	Gastric antrum	pT4aN3aM0/G3IIIc
Z74	female	43	160	57	22.2656	1	Gastric ulcer hypodifferentiated adenocarcinoma containing ring cell components	Gastric body - gastric horn	pT4aN2M0
Z75	male	77	162	57	21.7193	1	gastric cancer
Z76	female	69	145	40	19.025	0	gastric cancer		pT2N0M0/Ib
Z77	male	59	175	65	21.2245	1	Adenocarcinoma of the gastric antrum
Z78	female	75	148	55	25.1096	0	Adenocarcinoma of the stomach
