# Supplementary material for: A potential therapeutic approach for gastric cancer: inhibition of LACTB transcript 1
Source: Aging (Albany NY). 2023 Dec 26;15(24):15213–27. doi: 10.18632/aging.205345 (PMC10781463; doi:10.18632/aging.205345)
Supplement: Supplementary Table 2 [file aging-15-205345-s003.xlsx]

## Sheet: Sheet1
Supplementary Table 2. The differentially expressed genes which were correlated with LACTB in gastric cancer.
gene	correlation coefficients	P-value	FDR (BH)	Event_SD	Event_TD
NKD1	-0.419699	3.881e-19	1.62367e-16	415	415
DRD2	-0.413959	1.30063e-18	4.17543e-16	415	367
RERE	-0.411068	2.3707e-18	7.26475e-16	415	415
CPLX2	-0.402374	1.39274e-17	3.29756e-15	415	375
BMP7	-0.382183	6.99677e-16	1.04822e-13	415	414
BCL9	-0.378908	1.28789e-15	1.77194e-13	415	415
TRAPPC9	-0.377432	1.69169e-15	2.28096e-13	415	415
PLXNB1	-0.377024	1.82382e-15	2.41089e-13	415	415
FAM168B	-0.376968	1.84287e-15	2.42027e-13	415	415
PRPF40B	-0.373913	3.22356e-15	4.04948e-13	415	415
KCNIP3	-0.369504	7.15205e-15	8.50884e-13	415	415
GJC2	-0.362705	2.38669e-14	2.54057e-12	415	415
PHLDB3	-0.360136	3.73541e-14	3.85452e-12	415	415
CELF3	-0.359962	3.84969e-14	3.95229e-12	415	375
KCNH2	-0.359026	4.52708e-14	4.57801e-12	415	415
TMEM8B	-0.358956	4.58217e-14	4.61067e-12	415	415
CAB39L	-0.358312	5.12116e-14	5.05246e-12	415	415
OBSL1	-0.355365	8.49228e-14	8.10172e-12	415	415
LOC100128292	-0.354875	9.23189e-14	8.64422e-12	415	415
RGL2	-0.354247	1.02732e-13	9.44435e-12	415	415
TMEM198	-0.35409	1.05515e-13	9.65628e-12	415	415
CXXC5	-0.352962	1.27747e-13	1.1586e-11	415	415
CBFA2T2	-0.350162	2.04719e-13	1.77701e-11	415	415
RUNDC3A	-0.348863	2.54373e-13	2.14362e-11	415	406
ADRA2C	-0.348421	2.73818e-13	2.28842e-11	415	413
LAMA5	-0.34827	2.80817e-13	2.33726e-11	415	415
C20orf117	-0.346766	3.60447e-13	2.97553e-11	415	415
CHRNB2	-0.344501	5.23628e-13	4.15309e-11	415	409
C9orf45	-0.344355	5.36418e-13	4.20506e-11	415	415
C7orf41	-0.344213	5.49057e-13	4.28752e-11	415	415
COL9A3	-0.343501	6.16954e-13	4.74445e-11	415	413
ULK1	-0.343015	6.68003e-13	5.09825e-11	415	415
NUMA1	-0.342942	6.76004e-13	5.13992e-11	415	415
ANKS1A	-0.342803	6.9154e-13	5.21881e-11	415	415
MYT1	-0.341336	8.78138e-13	6.52954e-11	415	353
C14orf128	-0.340044	1.08259e-12	7.99102e-11	415	415
USP2	-0.339587	1.16549e-12	8.50979e-11	415	415
FREM2	-0.338313	1.43077e-12	1.02614e-10	415	400
KANK1	-0.338098	1.48097e-12	1.05467e-10	415	415
SCRT1	-0.338032	1.49674e-12	1.06216e-10	415	302
EMILIN3	-0.336614	1.87806e-12	1.30082e-10	415	414
GPR153	-0.336307	1.97221e-12	1.35674e-10	415	415
PLXNB3	-0.335843	2.12383e-12	1.45608e-10	415	415
SHF	-0.335228	2.3418e-12	1.59471e-10	415	415
HDAC5	-0.335081	2.39709e-12	1.62688e-10	415	415
FAM63A	-0.335018	2.42125e-12	1.63349e-10	415	415
AHDC1	-0.334402	2.6699e-12	1.78804e-10	415	415
PIP4K2B	-0.334108	2.7969e-12	1.86077e-10	415	415
SPTB	-0.332362	3.68318e-12	2.36484e-10	415	415
ZFHX3	-0.332069	3.85691e-12	2.46076e-10	415	415
F10	-0.332027	3.88246e-12	2.46927e-10	415	415
SRPK3	-0.33193	3.94218e-12	2.49939e-10	415	410
FZD10	-0.330858	4.66267e-12	2.91958e-10	415	414
SLC4A3	-0.330447	4.97186e-12	3.08454e-10	415	414
BAT2	-0.329009	6.21989e-12	3.80052e-10	415	415
HDAC4	-0.328451	6.78219e-12	4.10015e-10	415	415
CHD5	-0.32822	7.02926e-12	4.23116e-10	415	400
LOC100133545	-0.327867	7.42408e-12	4.43797e-10	415	340
ZFP41	-0.327854	7.43868e-12	4.43797e-10	415	415
PPP2R2C	-0.32778	7.5244e-12	4.47591e-10	415	402
CACNG4	-0.327243	8.17502e-12	4.80639e-10	415	402
DMWD	-0.327012	8.47167e-12	4.93598e-10	415	415
CASKIN2	-0.326996	8.49306e-12	4.93598e-10	415	415
CKB	-0.325975	9.9371e-12	5.72587e-10	415	415
CXXC4	-0.325743	1.02968e-11	5.91625e-10	415	396
ZNF517	-0.325427	1.08093e-11	6.17564e-10	415	415
IL17RD	-0.325291	1.10357e-11	6.28725e-10	415	415
BCORL1	-0.324912	1.16957e-11	6.6171e-10	415	415
REEP1	-0.324615	1.22394e-11	6.87616e-10	415	415
CDKN1C	-0.324477	1.24999e-11	6.98374e-10	415	415
LOC92973	-0.324218	1.30048e-11	7.22588e-10	415	412
RIMBP2	-0.323707	1.40575e-11	7.74286e-10	415	400
LRRC10B	-0.323693	1.40884e-11	7.74286e-10	415	415
GNAZ	-0.323565	1.43643e-11	7.8552e-10	415	415
NUDCD3	-0.323497	1.45141e-11	7.91235e-10	415	415
TEAD3	-0.32288	1.59421e-11	8.59813e-10	415	415
DCTN1	-0.322741	1.62816e-11	8.68854e-10	415	415
ATN1	-0.322395	1.71588e-11	9.06102e-10	415	415
PBX1	-0.321967	1.83071e-11	9.56747e-10	415	415
TSPYL3	-0.321839	1.86651e-11	9.72941e-10	415	413
DIDO1	-0.3214	1.99447e-11	1.03431e-09	415	415
GFRA3	-0.321186	2.05996e-11	1.06554e-09	415	404
DLGAP4	-0.320725	2.20841e-11	1.13652e-09	415	415
MLLT6	-0.320548	2.26809e-11	1.16426e-09	415	415
C16orf68	-0.320465	2.29648e-11	1.17585e-09	415	415
WDR35	-0.320094	2.42824e-11	1.23395e-09	415	415
ARHGEF4	-0.31946	2.6707e-11	1.35376e-09	415	415
RPRM	-0.319385	2.70103e-11	1.36403e-09	415	363
HOXA2	-0.319376	2.70446e-11	1.36403e-09	415	415
C1orf88	-0.319137	2.80291e-11	1.40348e-09	415	399
ASB1	-0.319136	2.8035e-11	1.40348e-09	415	415
ABCC8	-0.318913	2.89856e-11	1.44749e-09	415	312
EHBP1	-0.317076	3.81195e-11	1.85329e-09	415	415
PDZRN3	-0.316916	3.90397e-11	1.89347e-09	415	415
ASXL1	-0.316662	4.05391e-11	1.95331e-09	415	415
PRKAA2	-0.316269	4.29726e-11	2.04019e-09	415	411
CHRM3	-0.316239	4.31604e-11	2.04431e-09	415	415
UBE4B	-0.316098	4.40699e-11	2.08251e-09	415	415
GTF2IRD1	-0.315812	4.59795e-11	2.16768e-09	415	415
ADRA1D	-0.315679	4.6888e-11	2.19184e-09	415	412
ARC	-0.315335	4.93367e-11	2.28861e-09	415	407
ZDHHC8P1	-0.315223	5.01588e-11	2.31612e-09	415	390
MTSS1L	-0.315	5.18332e-11	2.38256e-09	415	415
SETD1A	-0.314797	5.34111e-11	2.44952e-09	415	415
PGAM2	-0.314137	5.88567e-11	2.65117e-09	415	415
GLTSCR1	-0.314085	5.93142e-11	2.65993e-09	415	415
C7orf51	-0.313984	6.01942e-11	2.69342e-09	415	405
NKAIN1	-0.313429	6.53088e-11	2.89031e-09	415	367
SOCS7	-0.312849	7.10974e-11	3.13278e-09	415	415
SEZ6	-0.312455	7.53086e-11	3.29679e-09	415	378
SHC2	-0.311403	8.77849e-11	3.80471e-09	415	415
SYT7	-0.311398	8.78516e-11	3.80471e-09	415	413
RASL10B	-0.31114	9.12148e-11	3.92515e-09	415	413
LTBP3	-0.311063	9.22335e-11	3.96056e-09	415	415
C15orf52	-0.310969	9.35046e-11	3.99816e-09	415	415
POLR2J4	-0.31081	9.56874e-11	4.08286e-09	415	415
FARP1	-0.310743	9.6626e-11	4.11423e-09	415	415
ZHX3	-0.31057	9.90796e-11	4.19223e-09	415	415
VWA2	-0.31028	1.03342e-10	4.35435e-09	415	412
TTC30A	-0.310041	1.06967e-10	4.49774e-09	415	415
KIAA0182	-0.30901	1.24161e-10	5.18835e-09	415	415
PLEKHG3	-0.308991	1.24501e-10	5.19184e-09	415	415
CEP68	-0.308926	1.2566e-10	5.22937e-09	415	415
KIAA0195	-0.308438	1.34811e-10	5.53055e-09	415	415
AGPAT1	-0.308179	1.39935e-10	5.72913e-09	415	415
GDF1	-0.30768	1.50322e-10	6.11724e-09	415	384
RXRB	-0.307575	1.52602e-10	6.17275e-09	415	415
PCIF1	-0.307451	1.55351e-10	6.25893e-09	415	415
BAIAP2	-0.307342	1.57793e-10	6.33206e-09	415	415
ZNF219	-0.307286	1.59052e-10	6.36995e-09	415	415
NYNRIN	-0.307156	1.62062e-10	6.46489e-09	415	415
NINL	-0.307103	1.63287e-10	6.48835e-09	415	415
FLJ90757	-0.307103	1.63292e-10	6.48835e-09	415	415
SYNGAP1	-0.307016	1.65332e-10	6.54371e-09	415	415
HOXA4	-0.306831	1.69757e-10	6.67966e-09	415	415
VANGL2	-0.306769	1.71269e-10	6.70002e-09	415	415
C1orf56	-0.306735	1.72114e-10	6.72009e-09	415	415
C9orf172	-0.306595	1.75601e-10	6.82988e-09	415	415
CRB2	-0.306523	1.77393e-10	6.88634e-09	415	410
SLC7A4	-0.306298	1.83184e-10	7.05964e-09	415	396
MAVS	-0.306171	1.86553e-10	7.17308e-09	415	415
LGI3	-0.305515	2.04809e-10	7.75704e-09	415	328
TTC30B	-0.305394	2.08371e-10	7.84787e-09	415	415
LY6G6D	-0.305053	2.18721e-10	8.16168e-09	415	111
AP3B2	-0.304944	2.22126e-10	8.27348e-09	415	373
KCNH8	-0.304488	2.36973e-10	8.76193e-09	415	404
FAM69B	-0.303955	2.55564e-10	9.38071e-09	415	415
NAV2	-0.30368	2.6569e-10	9.73474e-09	415	415
BAT2L1	-0.303388	2.76883e-10	1.009e-08	415	415
CARKD	-0.303282	2.81043e-10	1.02232e-08	415	415
CACNA1D	-0.302841	2.99079e-10	1.08403e-08	415	415
NEURL2	-0.302762	3.024e-10	1.0941e-08	415	415
APCDD1	-0.302596	3.09587e-10	1.11611e-08	415	415
TECPR2	-0.302415	3.17549e-10	1.14278e-08	415	415
TMEM136	-0.302167	3.28801e-10	1.17491e-08	415	414
AGBL5	-0.301723	3.4996e-10	1.24393e-08	415	415
WFS1	-0.301003	3.8707e-10	1.37101e-08	415	415
RPTOR	-0.300963	3.89289e-10	1.37646e-08	415	415
PLEKHB1	-0.299933	4.49442e-10	1.56994e-08	415	415
HOXA3	-0.299794	4.582e-10	1.59228e-08	415	415
EFHC1	-0.299739	4.6173e-10	1.59906e-08	415	415
CASC3	-0.299028	5.09701e-10	1.75916e-08	415	415
SEC14L5	-0.298216	5.70419e-10	1.9587e-08	415	406
GNAL	-0.29796	5.90966e-10	2.02238e-08	415	415
ARHGAP23	-0.297752	6.08242e-10	2.07448e-08	415	415
THRA	-0.297575	6.23255e-10	2.10791e-08	415	415
USP21	-0.297355	6.42523e-10	2.16584e-08	415	415
CEP164	-0.297246	6.52186e-10	2.19111e-08	415	415
MYST2	-0.296939	6.80432e-10	2.28221e-08	415	415
MAPRE3	-0.29691	6.83127e-10	2.28746e-08	415	415
SCAP	-0.296793	6.94174e-10	2.31678e-08	415	415
ZNF703	-0.296665	7.065e-10	2.35403e-08	415	415
SPEG	-0.296397	7.33019e-10	2.43437e-08	415	415
SLC2A12	-0.296206	7.52501e-10	2.49089e-08	415	415
SLC38A3	-0.296087	7.64919e-10	2.52786e-08	415	371
ZNF142	-0.295842	7.91085e-10	2.60158e-08	415	415
FBRS	-0.295521	8.26643e-10	2.69659e-08	415	415
ZNF444	-0.295215	8.61956e-10	2.78819e-08	415	415
PCLO	-0.295195	8.64374e-10	2.78819e-08	415	409
BBS1	-0.295112	8.74277e-10	2.81565e-08	415	415
MSMP	-0.294942	8.94808e-10	2.87262e-08	415	415
VWA5B2	-0.294503	9.50104e-10	3.02612e-08	415	403
BAT3	-0.294471	9.54162e-10	3.0295e-08	415	415
SRF	-0.294249	9.83553e-10	3.11793e-08	415	415
IRF2BP1	-0.294186	9.9201e-10	3.13981e-08	415	415
ZNRF3	-0.294121	1.00083e-09	3.16277e-08	415	415
RNF182	-0.293622	1.07116e-09	3.35878e-08	415	385
FRMPD1	-0.293541	1.08302e-09	3.39074e-08	415	380
PKP1	-0.293262	1.12483e-09	3.50536e-08	415	402
TPD52L1	-0.293214	1.13216e-09	3.51957e-08	415	415
ZNF704	-0.29321	1.13288e-09	3.51957e-08	415	414
PPP1R13B	-0.293135	1.14437e-09	3.54516e-08	415	415
LDLRAD3	-0.292799	1.1978e-09	3.67054e-08	415	414
PITPNM3	-0.292707	1.21273e-09	3.71067e-08	415	415
ACCN2	-0.292662	1.22025e-09	3.72803e-08	415	415
ACACA	-0.291997	1.33505e-09	4.04213e-08	415	415
WDTC1	-0.291273	1.4719e-09	4.4168e-08	415	415
CACNA2D2	-0.291119	1.50288e-09	4.49704e-08	415	415
NPTXR	-0.29103	1.52096e-09	4.54378e-08	415	415
GNG4	-0.290972	1.53276e-09	4.55884e-08	415	413
SMTN	-0.290762	1.57674e-09	4.66905e-08	415	415
ATOH8	-0.290398	1.65581e-09	4.87462e-08	415	415
C11orf95	-0.29036	1.66428e-09	4.88976e-08	415	415
MYRIP	-0.290353	1.66578e-09	4.88976e-08	415	411
MAPK8IP1	-0.290215	1.69689e-09	4.95233e-08	415	415
BRSK2	-0.289934	1.76217e-09	5.12805e-08	415	409
SYP	-0.289515	1.86387e-09	5.40069e-08	415	415
CRTC1	-0.289304	1.91722e-09	5.52361e-08	415	415
NTSR1	-0.289285	1.92202e-09	5.52956e-08	415	408
SETD1B	-0.289196	1.94494e-09	5.57962e-08	415	415
MECP2	-0.288913	2.02007e-09	5.7706e-08	415	415
IRF2BP2	-0.288868	2.03221e-09	5.79711e-08	415	415
PPARGC1A	-0.288829	2.04273e-09	5.81891e-08	415	414
L1CAM	-0.288645	2.09343e-09	5.94656e-08	415	415
CTTNBP2	-0.288582	2.11099e-09	5.98804e-08	415	415
FBN3	-0.288363	2.17356e-09	6.13971e-08	415	243
KIAA1267	-0.288089	2.25444e-09	6.35043e-08	415	415
UNK	-0.287659	2.38705e-09	6.67746e-08	415	415
SREBF2	-0.287638	2.39375e-09	6.68697e-08	415	415
SCARA3	-0.28757	2.41543e-09	6.73821e-08	415	415
LRP5	-0.287501	2.43765e-09	6.78149e-08	415	415
SALL2	-0.28746	2.45093e-09	6.79974e-08	415	415
STX1A	-0.287372	2.47951e-09	6.86021e-08	415	415
SH3BP5L	-0.287334	2.49226e-09	6.88605e-08	415	415
WIZ	-0.287293	2.50575e-09	6.91389e-08	415	415
KLHL29	-0.286745	2.69434e-09	7.39391e-08	415	415
FLJ37453	-0.286563	2.76011e-09	7.5539e-08	415	415
ABL1	-0.286477	2.79156e-09	7.60908e-08	415	415
WNK2	-0.286304	2.85612e-09	7.76412e-08	415	415
ARHGEF37	-0.285917	3.00606e-09	8.10635e-08	415	415
ITGA7	-0.285889	3.0172e-09	8.12494e-08	415	415
PCSK1N	-0.285879	3.02099e-09	8.12494e-08	415	408
MAPK4	-0.285247	3.28331e-09	8.77934e-08	415	379
SYNGR1	-0.285112	3.34235e-09	8.90634e-08	415	415
CHGB	-0.285092	3.35117e-09	8.91808e-08	415	391
DLG5	-0.284697	3.52926e-09	9.34284e-08	415	415
TP53INP2	-0.284409	3.66556e-09	9.69097e-08	415	415
ARL4D	-0.284384	3.67751e-09	9.70987e-08	415	415
PPT2	-0.28426	3.73764e-09	9.85578e-08	415	415
MPL	-0.284211	3.76199e-09	9.89418e-08	415	415
BCL2L2	-0.28413	3.80193e-09	9.98624e-08	415	415
TEAD1	-0.284111	3.81148e-09	9.99833e-08	415	415
ZNF462	-0.283943	3.89625e-09	1.01943e-07	415	415
FLRT1	-0.283904	3.91596e-09	1.02326e-07	415	413
CALY	-0.283256	4.26201e-09	1.10654e-07	415	308
FBXL20	-0.283054	4.37621e-09	1.1295e-07	415	415
HDAC11	-0.28305	4.37838e-09	1.1295e-07	415	415
PRDM11	-0.283022	4.3946e-09	1.13224e-07	415	415
LOC399744	-0.283008	4.40209e-09	1.13273e-07	415	415
GTF3C1	-0.282974	4.4218e-09	1.13347e-07	415	415
KAZ	-0.282714	4.57457e-09	1.16967e-07	415	415
GPR135	-0.282413	4.75719e-09	1.21177e-07	415	415
POFUT1	-0.282283	4.83837e-09	1.22935e-07	415	415
HOXB3	-0.282125	4.9388e-09	1.24474e-07	415	415
MTSS1	-0.281655	5.24954e-09	1.31226e-07	415	415
NEURL1B	-0.281646	5.25554e-09	1.31226e-07	415	415
ADAMTSL2	-0.281111	5.63292e-09	1.39958e-07	415	415
ETNK2	-0.281065	5.66648e-09	1.40619e-07	415	415
MMP24	-0.281046	5.68026e-09	1.40788e-07	415	415
C20orf4	-0.281028	5.69321e-09	1.40936e-07	415	415
INHA	-0.280991	5.72105e-09	1.41453e-07	415	351
NNAT	-0.280954	5.74818e-09	1.4195e-07	415	415
KLHL21	-0.28087	5.81112e-09	1.43329e-07	415	415
SORBS2	-0.280859	5.81958e-09	1.43363e-07	415	415
SCMH1	-0.280437	6.14555e-09	1.50659e-07	415	415
RBP1	-0.280097	6.42127e-09	1.57038e-07	415	415
C5orf4	-0.279894	6.59084e-09	1.60602e-07	415	415
HUNK	-0.27964	6.81053e-09	1.65557e-07	415	415
CHD6	-0.279065	7.33239e-09	1.76966e-07	415	415
TNRC18	-0.278848	7.53964e-09	1.81751e-07	415	415
C6orf124	-0.27881	7.5765e-09	1.82391e-07	415	414
KCNC1	-0.278619	7.76405e-09	1.86273e-07	415	383
GPR62	-0.278504	7.8798e-09	1.88826e-07	415	385
DNM1	-0.278386	7.99938e-09	1.91464e-07	415	415
IGSF11	-0.278303	8.08494e-09	1.93283e-07	415	389
MPP2	-0.278015	8.38833e-09	1.99828e-07	415	415
MARK1	-0.277858	8.55848e-09	2.03641e-07	415	415
LONRF2	-0.277822	8.59801e-09	2.04342e-07	415	411
LOC158696	-0.277776	8.64798e-09	2.05288e-07	415	335
AMIGO1	-0.277606	8.83862e-09	2.09322e-07	415	415
ZNF516	-0.277365	9.11442e-09	2.15349e-07	415	415
UBOX5	-0.277297	9.19381e-09	2.16972e-07	415	415
CREBBP	-0.277231	9.27073e-09	2.18278e-07	415	415
SMTNL2	-0.276682	9.94234e-09	2.32697e-07	415	408
KBTBD7	-0.27666	9.96951e-09	2.32833e-07	415	415
CYP39A1	-0.276126	1.06701e-08	2.47765e-07	415	411
MNT	-0.275838	1.10659e-08	2.56367e-07	415	415
AMT	-0.275815	1.10982e-08	2.56822e-07	415	415
TM7SF2	-0.275614	1.13855e-08	2.63167e-07	415	415
KIF1A	-0.275543	1.14872e-08	2.65215e-07	415	373
ZNF34	-0.27543	1.1654e-08	2.68759e-07	415	415
PTCH1	-0.275407	1.16878e-08	2.69232e-07	415	415
XKR7	-0.275394	1.17067e-08	2.6936e-07	415	237
TACC2	-0.27513	1.21034e-08	2.77855e-07	415	415
ARTN	-0.274949	1.23833e-08	2.83959e-07	415	413
UBXN10	-0.274624	1.29023e-08	2.94524e-07	415	413
TTYH1	-0.274581	1.29723e-08	2.9579e-07	415	415
VGF	-0.27456	1.30068e-08	2.95908e-07	415	414
ACAP3	-0.274471	1.31533e-08	2.98906e-07	415	415
TRMT61A	-0.274434	1.32142e-08	2.99953e-07	415	415
MLNR	-0.274216	1.35819e-08	3.07265e-07	415	290
HOXD3	-0.274095	1.37911e-08	3.11301e-07	415	412
L3MBTL	-0.273987	1.39801e-08	3.15216e-07	415	415
NRTN	-0.273955	1.40364e-08	3.16132e-07	415	414
TSC22D1	-0.273877	1.41738e-08	3.18871e-07	415	415
CERK	-0.273495	1.48712e-08	3.3263e-07	415	415
C2orf81	-0.273488	1.48841e-08	3.3263e-07	415	415
SPTBN2	-0.273349	1.51466e-08	3.3775e-07	415	415
SLC25A27	-0.273127	1.55744e-08	3.46527e-07	415	414
PSKH1	-0.273008	1.58083e-08	3.51343e-07	415	415
C12orf34	-0.272799	1.62266e-08	3.59063e-07	415	415
PHF2	-0.272654	1.65242e-08	3.65247e-07	415	415
BSN	-0.272486	1.68763e-08	3.72217e-07	415	415
PCP4L1	-0.272387	1.70845e-08	3.7558e-07	415	390
CBX6	-0.271876	1.82099e-08	3.99637e-07	415	415
HRNR	-0.271842	1.82894e-08	4.0074e-07	415	385
WASF3	-0.271832	1.8312e-08	4.0074e-07	415	415
SCN3B	-0.271825	1.8328e-08	4.0074e-07	415	413
PKD1	-0.271731	1.85441e-08	4.04945e-07	415	415
PCNXL2	-0.271724	1.85604e-08	4.04945e-07	415	415
FGF18	-0.271641	1.87519e-08	4.08243e-07	415	413
LOC728819	-0.271457	1.91866e-08	4.17256e-07	415	398
SGEF	-0.271328	1.94967e-08	4.23092e-07	415	415
RPRD2	-0.270828	2.07483e-08	4.46419e-07	415	415
CTNNA2	-0.270812	2.07898e-08	4.46837e-07	415	299
KLK14	-0.270631	2.12628e-08	4.54602e-07	415	351
BRD3	-0.270598	2.13483e-08	4.55573e-07	415	415
ZNF687	-0.27043	2.17985e-08	4.63648e-07	415	415
GDAP1	-0.270429	2.18012e-08	4.63648e-07	415	415
SOBP	-0.27038	2.19338e-08	4.6549e-07	415	415
SLC16A11	-0.270345	2.20281e-08	4.67e-07	415	411
DBN1	-0.270177	2.24936e-08	4.76233e-07	415	415
STK35	-0.27017	2.25107e-08	4.76233e-07	415	415
SLC29A4	-0.269968	2.30809e-08	4.86769e-07	415	415
NCRNA00087	-0.26985	2.34228e-08	4.9238e-07	415	413
TTC25	-0.269813	2.35282e-08	4.93325e-07	415	410
COL4A5	-0.26981	2.35381e-08	4.93325e-07	415	414
TPPP3	-0.269786	2.36065e-08	4.94246e-07	415	415
PRRT4	-0.269546	2.43173e-08	5.07551e-07	415	360
HOMER2	-0.269137	2.55775e-08	5.31659e-07	415	414
SFTPD	-0.269081	2.57557e-08	5.34265e-07	415	337
KIAA0556	-0.268692	2.70211e-08	5.57654e-07	415	415
LZTS2	-0.268637	2.72045e-08	5.60868e-07	415	415
CCDC85C	-0.268261	2.849e-08	5.86176e-07	415	415
EIF4EBP2	-0.267719	3.04501e-08	6.23966e-07	415	415
BRSK1	-0.267627	3.0797e-08	6.30434e-07	415	415
RARA	-0.267528	3.11702e-08	6.36865e-07	415	415
MDC1	-0.26752	3.12006e-08	6.36865e-07	415	415
POLM	-0.267519	3.12056e-08	6.36865e-07	415	415
BAHCC1	-0.267463	3.14208e-08	6.40611e-07	415	415
MGAT5B	-0.267416	3.16007e-08	6.42982e-07	415	401
MYEF2	-0.266719	3.44149e-08	6.9396e-07	415	414
LYNX1	-0.266631	3.47863e-08	6.99356e-07	415	415
ZHX2	-0.266309	3.61778e-08	7.24451e-07	415	415
GGT7	-0.266229	3.65365e-08	7.30911e-07	415	415
DMPK	-0.266112	3.70602e-08	7.39924e-07	415	415
KCNT1	-0.26601	3.7524e-08	7.47707e-07	415	372
MYOM3	-0.265892	3.80674e-08	7.57788e-07	415	413
SPPL2B	-0.26582	3.84004e-08	7.62915e-07	415	415
CHD4	-0.265736	3.87928e-08	7.69955e-07	415	415
ACVR2B	-0.265246	4.11754e-08	8.1246e-07	415	415
MAFG	-0.265222	4.12967e-08	8.14059e-07	415	415
ENAH	-0.265076	4.20312e-08	8.25464e-07	415	415
OXGR1	-0.265059	4.21201e-08	8.25464e-07	415	315
SLC24A5	-0.265034	4.2246e-08	8.26493e-07	415	362
CUEDC1	-0.265031	4.22619e-08	8.26493e-07	415	415
RGN	-0.265008	4.23785e-08	8.27321e-07	415	411
KIAA0467	-0.264991	4.24691e-08	8.28291e-07	415	415
DACT2	-0.264837	4.32681e-08	8.42249e-07	415	378
SEPT9	-0.264818	4.33705e-08	8.43079e-07	415	415
GPRASP2	-0.264813	4.33941e-08	8.43079e-07	415	415
TSPYL4	-0.264628	4.43766e-08	8.59689e-07	415	415
CIC	-0.264569	4.46938e-08	8.65008e-07	415	415
LOC100270746	-0.264158	4.69729e-08	9.06514e-07	415	406
TCF7	-0.264038	4.7662e-08	9.1806e-07	415	415
SLC8A2	-0.263885	4.8547e-08	9.32444e-07	415	390
KIAA0892	-0.263782	4.91561e-08	9.41459e-07	415	415
DLX3	-0.263668	4.98375e-08	9.53608e-07	415	318
ZNF646	-0.263649	4.99477e-08	9.54813e-07	415	415
OGDHL	-0.263629	5.00688e-08	9.56225e-07	415	362
UNC45A	-0.263541	5.06044e-08	9.64297e-07	415	415
DOCK3	-0.263513	5.07737e-08	9.6513e-07	415	415
GSTA4	-0.263341	5.18372e-08	9.83496e-07	415	415
PHC1	-0.263296	5.21222e-08	9.8704e-07	415	415
MYL3	-0.263288	5.21704e-08	9.8704e-07	415	250
ZNF323	-0.263237	5.24924e-08	9.92205e-07	415	415
LOC255167	-0.263137	5.31266e-08	1.00325e-06	415	335
NMNAT2	-0.263097	5.33829e-08	1.00715e-06	415	414
ZNF717	-0.262818	5.52043e-08	1.0338e-06	415	414
PAH	-0.262759	5.56001e-08	1.03929e-06	415	303
C20orf112	-0.262743	5.57077e-08	1.04034e-06	415	415
FAM48A	-0.262733	5.57709e-08	1.04056e-06	415	415
RAB36	-0.262502	5.73414e-08	1.06691e-06	415	415
F7	-0.262491	5.74147e-08	1.06729e-06	415	386
SEMA6C	-0.262347	5.84189e-08	1.08496e-06	415	415
MCF2L	-0.262284	5.88571e-08	1.0901e-06	415	415
MEGF8	-0.262196	5.94858e-08	1.10073e-06	415	415
PEG10	-0.262088	6.02623e-08	1.11408e-06	415	415
TCF7L1	-0.261831	6.21407e-08	1.14358e-06	415	415
KREMEN1	-0.261805	6.23381e-08	1.14513e-06	415	415
IGSF3	-0.261786	6.24761e-08	1.14577e-06	415	415
VEZF1	-0.261785	6.24862e-08	1.14577e-06	415	415
GRLF1	-0.261618	6.37436e-08	1.16671e-06	415	415
CASZ1	-0.261562	6.41757e-08	1.17356e-06	415	415
DST	-0.261549	6.42769e-08	1.17434e-06	415	415
PPL	-0.261327	6.60048e-08	1.20483e-06	415	415
ROGDI	-0.261254	6.65805e-08	1.21424e-06	415	415
BRPF3	-0.26124	6.66936e-08	1.21521e-06	415	415
KCNB2	-0.261073	6.80345e-08	1.23852e-06	415	325
GRB10	-0.26067	7.13839e-08	1.28805e-06	415	415
SRCIN1	-0.260669	7.13918e-08	1.28805e-06	415	415
TUBG2	-0.260636	7.16695e-08	1.2919e-06	415	415
ZNF623	-0.260585	7.21045e-08	1.29859e-06	415	415
SLC22A3	-0.260495	7.28849e-08	1.31147e-06	415	413
MAGI2	-0.260379	7.38998e-08	1.32856e-06	415	415
NIPAL3	-0.260306	7.45414e-08	1.33771e-06	415	415
FOXO3B	-0.260267	7.4893e-08	1.34283e-06	415	415
ZNF446	-0.260174	7.5717e-08	1.3552e-06	415	415
NKD2	-0.26011	7.62955e-08	1.36314e-06	415	411
C1QL1	-0.260079	7.65765e-08	1.36575e-06	415	415
TBKBP1	-0.259792	7.92334e-08	1.41189e-06	415	415
C6orf168	-0.259619	8.08761e-08	1.43754e-06	415	412
TSC2	-0.259618	8.08859e-08	1.43754e-06	415	415
GDNF	-0.259597	8.10873e-08	1.43943e-06	415	335
FSTL4	-0.259498	8.20476e-08	1.45308e-06	415	363
PDLIM4	-0.259242	8.45771e-08	1.49265e-06	415	415
SCXB	-0.259229	8.47069e-08	1.49363e-06	415	414
GTF2IP1	-0.259213	8.48595e-08	1.49372e-06	415	415
NOTCH1	-0.258942	8.76278e-08	1.53637e-06	415	415
CLGN	-0.258939	8.76624e-08	1.53637e-06	415	391
FOXO3	-0.258914	8.79192e-08	1.53832e-06	415	415
NHLRC1	-0.258834	8.87586e-08	1.55155e-06	415	415
RFX1	-0.25879	8.92178e-08	1.55787e-06	415	415
CLASP1	-0.258785	8.92745e-08	1.55787e-06	415	415
PTPRT	-0.258393	9.34997e-08	1.62739e-06	415	393
LOC100128239	-0.25828	9.47551e-08	1.64641e-06	415	380
TUBB2B	-0.258238	9.52216e-08	1.6531e-06	415	407
LOC349196	-0.258216	9.54699e-08	1.65598e-06	415	396
TTC9	-0.258087	9.69338e-08	1.67994e-06	415	415
MGC57346	-0.257842	9.97775e-08	1.72316e-06	415	415
C1orf161	-0.257755	1.00801e-07	1.73802e-06	415	355
CEP250	-0.257739	1.00991e-07	1.73981e-06	415	415
VSIG8	-0.257645	1.02109e-07	1.75758e-06	415	367
TSNARE1	-0.257613	1.02497e-07	1.76275e-06	415	415
PRKCA	-0.257546	1.03311e-07	1.77268e-06	415	415
KIAA1737	-0.257544	1.03337e-07	1.77268e-06	415	415
RIPPLY2	-0.257375	1.05408e-07	1.80361e-06	415	131
NDRG4	-0.257193	1.07685e-07	1.83792e-06	415	415
TAGLN3	-0.257158	1.08124e-07	1.84349e-06	415	291
KCNJ9	-0.257145	1.08291e-07	1.84359e-06	415	341
PRR18	-0.257102	1.08836e-07	1.85131e-06	415	317
SLC39A2	-0.257077	1.09163e-07	1.85531e-06	415	283
MTUS2	-0.256981	1.10394e-07	1.87309e-06	415	399
LOC100134368	-0.256971	1.10526e-07	1.87376e-06	415	415
ASB16	-0.256905	1.11386e-07	1.88675e-06	415	414
PDE9A	-0.256762	1.13263e-07	1.91373e-06	415	412
HSFX2	-0.256746	1.13478e-07	1.91577e-06	415	414
KCNK3	-0.256681	1.14341e-07	1.92425e-06	415	415
NOTUM	-0.25668	1.14361e-07	1.92425e-06	415	411
FAM123C	-0.25667	1.14493e-07	1.92487e-06	415	310
PLEKHM3	-0.256295	1.19629e-07	2.0029e-06	415	415
SLC20A2	-0.256236	1.20457e-07	2.01343e-06	415	415
RCOR2	-0.256184	1.21196e-07	2.0241e-06	415	414
DPF2	-0.256062	1.22936e-07	2.04977e-06	415	415
KRT222	-0.255979	1.24134e-07	2.06702e-06	415	415
CRABP1	-0.25597	1.24266e-07	2.06702e-06	415	341
VWA1	-0.255909	1.25152e-07	2.07687e-06	415	415
ZRANB1	-0.255907	1.25177e-07	2.07687e-06	415	415
TSHZ1	-0.255732	1.27768e-07	2.11638e-06	415	415
ANXA9	-0.255691	1.28377e-07	2.123e-06	415	415
SEMA6A	-0.255381	1.33105e-07	2.19579e-06	415	415
FXC1	-0.255141	1.3687e-07	2.25057e-06	415	415
LDB1	-0.255046	1.38387e-07	2.27182e-06	415	415
ZSCAN20	-0.254614	1.45515e-07	2.37342e-06	415	415
BBS10	-0.254526	1.47004e-07	2.39577e-06	415	415
DCAF8	-0.254506	1.47347e-07	2.39943e-06	415	415
SMOC1	-0.254431	1.48644e-07	2.41666e-06	415	412
ATF7	-0.254392	1.49316e-07	2.42563e-06	415	415
INTS1	-0.254305	1.50823e-07	2.44815e-06	415	415
CAPS	-0.254288	1.51125e-07	2.45108e-06	415	415
STK32A	-0.254182	1.52988e-07	2.47931e-06	415	298
RND2	-0.254115	1.54194e-07	2.49685e-06	415	415
LOC100130015	-0.254046	1.55428e-07	2.51281e-06	415	414
C20orf144	-0.253787	1.60159e-07	2.58516e-06	415	302
RIMS4	-0.253753	1.60781e-07	2.59313e-06	415	375
EFR3B	-0.253621	1.63258e-07	2.62681e-06	415	415
CDK5R2	-0.253511	1.6535e-07	2.65835e-06	415	387
FHOD3	-0.253483	1.65882e-07	2.66479e-06	415	415
KY	-0.253476	1.66032e-07	2.66507e-06	415	405
GRPR	-0.253465	1.66235e-07	2.66541e-06	415	401
KRBA1	-0.253254	1.70333e-07	2.72546e-06	415	415
NKPD1	-0.253246	1.70491e-07	2.72584e-06	415	409
SLC41A3	-0.253126	1.7288e-07	2.75966e-06	415	415
QRFP	-0.25305	1.74386e-07	2.77931e-06	415	332
NFATC4	-0.25253	1.85167e-07	2.94188e-06	415	415
CACNB3	-0.252486	1.86112e-07	2.95457e-06	415	415
GRIP1	-0.252402	1.87906e-07	2.9807e-06	415	415
ZNF579	-0.252345	1.89139e-07	2.99791e-06	415	415
THSD1P1	-0.252134	1.93789e-07	3.06681e-06	415	415
PLCD4	-0.252087	1.94841e-07	3.08104e-06	415	415
POLR3E	-0.252062	1.95389e-07	3.0873e-06	415	415
SH3GL2	-0.251941	1.98137e-07	3.12827e-06	415	334
IGSF1	-0.251846	2.00297e-07	3.15745e-06	415	384
DUSP22	-0.251821	2.00884e-07	3.16423e-06	415	415
MED22	-0.251649	2.04874e-07	3.22457e-06	415	415
LOC100130581	-0.25164	2.05107e-07	3.22573e-06	415	415
GON4L	-0.251558	2.07029e-07	3.24983e-06	415	415
SRCAP	-0.251554	2.07121e-07	3.24983e-06	415	415
KLHL36	-0.25148	2.08899e-07	3.27518e-06	415	415
KC6	-0.251464	2.09272e-07	3.27698e-06	415	152
LRRN4	-0.251373	2.11458e-07	3.30663e-06	415	408
FGD1	-0.251369	2.11559e-07	3.30663e-06	415	415
IGSF9B	-0.251272	2.13924e-07	3.33844e-06	415	414
PCP4	-0.251183	2.16125e-07	3.36287e-06	415	347
ZNF750	-0.251157	2.16765e-07	3.36977e-06	415	413
C8orf45	-0.251025	2.20066e-07	3.41061e-06	415	414
FOXP4	-0.25069	2.2865e-07	3.53281e-06	415	415
NBEA	-0.250362	2.37382e-07	3.65762e-06	415	415
C3orf70	-0.250359	2.37451e-07	3.65762e-06	415	415
FAM46B	-0.250337	2.38039e-07	3.66388e-06	415	414
C20orf195	-0.25027	2.3988e-07	3.68941e-06	415	404
FGF19	-0.250236	2.40807e-07	3.70085e-06	415	340
NMNAT3	-0.250194	2.41965e-07	3.71583e-06	415	415
HRASLS	-0.250159	2.42925e-07	3.72774e-06	415	340
PRRT3	-0.250042	2.46179e-07	3.76909e-06	415	415
C8orf47	-0.249839	2.51944e-07	3.85444e-06	415	398
C17orf69	-0.249789	2.5337e-07	3.86748e-06	415	415
SH3GL3	-0.24975	2.54518e-07	3.88208e-06	415	207
PNMT	-0.249535	2.60816e-07	3.96617e-06	415	372
HCFC1	-0.249234	2.69889e-07	4.08571e-06	415	415
CRABP2	-0.249096	2.7414e-07	4.14696e-06	415	414
CKMT2	-0.249074	2.74816e-07	4.15407e-06	415	387
DNM1P35	-0.249034	2.76062e-07	4.16893e-06	415	415
INPP5A	-0.248918	2.7972e-07	4.21874e-06	415	415
ATP6V1B1	-0.24881	2.83174e-07	4.26448e-06	415	407
ARVCF	-0.248735	2.85568e-07	4.29562e-06	415	415
KDM4B	-0.248732	2.85666e-07	4.29562e-06	415	415
ARHGEF11	-0.248657	2.8812e-07	4.32608e-06	415	415
NRG2	-0.248594	2.90187e-07	4.35388e-06	415	402
JRK	-0.248524	2.92501e-07	4.38535e-06	415	415
ZNF157	-0.248512	2.92899e-07	4.38806e-06	415	267
AIF1L	-0.248475	2.94125e-07	4.40316e-06	415	415
PDK2	-0.248251	3.01664e-07	4.51269e-06	415	415
PCDHGC5	-0.248222	3.02649e-07	4.52408e-06	415	404
LOC339290	-0.24811	3.06485e-07	4.57804e-06	415	415
RXRG	-0.248072	3.07813e-07	4.59328e-06	415	318
HFM1	-0.248058	3.08302e-07	4.59328e-06	415	315
CAMKV	-0.248054	3.08433e-07	4.59328e-06	415	337
LMX1A	-0.24797	3.11401e-07	4.62732e-06	415	176
FBXO27	-0.247965	3.11546e-07	4.62732e-06	415	415
FOXN1	-0.247828	3.16399e-07	4.69492e-06	415	344
IGFN1	-0.247669	3.22152e-07	4.77327e-06	415	311
MICAL3	-0.247645	3.23029e-07	4.78096e-06	415	415
COL4A6	-0.247608	3.24349e-07	4.79529e-06	415	408
NCOA6	-0.247535	3.27035e-07	4.83147e-06	415	415
DVL3	-0.247407	3.31803e-07	4.89362e-06	415	415
SVIL	-0.247402	3.31967e-07	4.89362e-06	415	415
TMEM17	-0.247222	3.38777e-07	4.97586e-06	415	413
HMGCLL1	-0.247192	3.39918e-07	4.989e-06	415	339
GFOD2	-0.247035	3.45987e-07	5.07072e-06	415	415
KIAA1614	-0.246925	3.50264e-07	5.12967e-06	415	415
POGZ	-0.246855	3.53039e-07	5.16658e-06	415	415
MKL2	-0.246824	3.54277e-07	5.18096e-06	415	415
C12orf51	-0.246753	3.57109e-07	5.2186e-06	415	415
EXOC7	-0.246728	3.58109e-07	5.22565e-06	415	415
FAM20B	-0.246642	3.61591e-07	5.26503e-06	415	415
NEFL	-0.246636	3.61848e-07	5.26503e-06	415	358
ZFAT	-0.246587	3.63844e-07	5.28905e-06	415	415
PBXIP1	-0.246582	3.64053e-07	5.28905e-06	415	415
LOC283174	-0.246576	3.64284e-07	5.28905e-06	415	414
MYH7B	-0.246455	3.69248e-07	5.3496e-06	415	413
C11orf2	-0.246327	3.74597e-07	5.42321e-06	415	415
POMT2	-0.246311	3.75283e-07	5.42926e-06	415	415
GPER	-0.24626	3.77405e-07	5.44827e-06	415	415
ProSAPiP1	-0.246202	3.79862e-07	5.47982e-06	415	415
MAPT	-0.246054	3.86217e-07	5.55565e-06	415	414
ESRRG	-0.246012	3.88048e-07	5.57725e-06	415	401
SCN8A	-0.245991	3.88957e-07	5.58315e-06	415	415
SLC29A1	-0.245959	3.90345e-07	5.59909e-06	415	415
FAM181B	-0.245941	3.91163e-07	5.60288e-06	415	367
ACTL6B	-0.245854	3.9497e-07	5.64521e-06	415	112
OSBP2	-0.245787	3.97938e-07	5.67581e-06	415	415
ACTA1	-0.245633	4.04856e-07	5.76634e-06	415	367
RBM20	-0.245557	4.08288e-07	5.81113e-06	415	407
SCN5A	-0.245496	4.11102e-07	5.84456e-06	415	405
NCRNA00094	-0.245487	4.11503e-07	5.84456e-06	415	415
SLC16A9	-0.245452	4.13126e-07	5.86349e-06	415	410
C14orf4	-0.245399	4.15568e-07	5.89401e-06	415	415
SGSM1	-0.245364	4.17192e-07	5.9129e-06	415	413
GDPD5	-0.24533	4.18787e-07	5.9272e-06	415	415
MAMSTR	-0.245296	4.204e-07	5.94525e-06	415	415
MLLT11	-0.24529	4.2065e-07	5.94525e-06	415	415
SLC25A4	-0.245212	4.24353e-07	5.98986e-06	415	415
WNT11	-0.245101	4.2964e-07	6.05117e-06	415	413
PCDH19	-0.245049	4.32113e-07	6.07752e-06	415	414
BCAS3	-0.244946	4.37127e-07	6.13525e-06	415	415
ZNF48	-0.24492	4.38369e-07	6.14842e-06	415	415
MLL4	-0.244841	4.4224e-07	6.19411e-06	415	415
FOXD3	-0.24477	4.4575e-07	6.23896e-06	415	353
DNAJC5	-0.244561	4.56243e-07	6.3638e-06	415	415
CDON	-0.244461	4.61364e-07	6.4295e-06	415	415
MEF2D	-0.24439	4.65033e-07	6.46856e-06	415	415
ZNF827	-0.244335	4.67859e-07	6.50339e-06	415	415
NCK2	-0.244207	4.74574e-07	6.58316e-06	415	415
NT5C3L	-0.244198	4.7505e-07	6.58525e-06	415	415
PCDHGC3	-0.24413	4.78615e-07	6.6256e-06	415	415
PART1	-0.244107	4.79847e-07	6.63393e-06	415	397
CDK20	-0.244107	4.79873e-07	6.63393e-06	415	415
CHRNB4	-0.24407	4.81825e-07	6.65636e-06	415	391
LOC284009	-0.244025	4.8423e-07	6.68502e-06	415	369
TF	-0.243962	4.87641e-07	6.71835e-06	415	381
GPR17	-0.243946	4.88511e-07	6.72576e-06	415	404
LASS4	-0.243871	4.92575e-07	6.77249e-06	415	415
GOLGA7B	-0.243721	5.00874e-07	6.87257e-06	415	415
GRIN2B	-0.243445	5.1642e-07	7.0667e-06	415	319
SKIV2L	-0.243431	5.1719e-07	7.07246e-06	415	415
DFNB31	-0.243385	5.19847e-07	7.104e-06	415	415
WDR88	-0.243129	5.34773e-07	7.29317e-06	415	399
NCRNA00086	-0.243109	5.35962e-07	7.29774e-06	415	410
HS3ST4	-0.243101	5.3642e-07	7.29774e-06	415	253
CHRNA4	-0.243099	5.36551e-07	7.29774e-06	415	238
DPYSL5	-0.243004	5.42234e-07	7.35525e-06	415	299
ZCCHC14	-0.242973	5.44046e-07	7.37489e-06	415	415
RAB40A	-0.242955	5.45156e-07	7.38498e-06	415	390
LOC647979	-0.242928	5.46809e-07	7.40241e-06	415	415
ZNF358	-0.242817	5.53541e-07	7.48854e-06	415	415
GMEB2	-0.24271	5.601e-07	7.57221e-06	415	415
KLHDC5	-0.242606	5.6654e-07	7.65308e-06	415	415
BCL11A	-0.242602	5.66839e-07	7.65308e-06	415	415
NODAL	-0.242564	5.69209e-07	7.67484e-06	415	404
TMEM9	-0.242508	5.72752e-07	7.71233e-06	415	415
ZNF514	-0.242469	5.75207e-07	7.74022e-06	415	415
ZNF496	-0.242342	5.83298e-07	7.84388e-06	415	415
LOC645676	-0.242251	5.8915e-07	7.90681e-06	415	415
NELL1	-0.242214	5.91564e-07	7.92868e-06	415	317
C1orf66	-0.242169	5.94502e-07	7.96279e-06	415	415
CDK5R1	-0.242151	5.95666e-07	7.97309e-06	415	415
CRHR2	-0.241839	6.16526e-07	8.23596e-06	415	263
GATSL2	-0.241792	6.19659e-07	8.27235e-06	415	386
DIRAS1	-0.241781	6.20448e-07	8.27742e-06	415	407
KRTAP3-1	-0.241587	6.33818e-07	8.41691e-06	415	153
ISM2	-0.24153	6.3781e-07	8.45882e-06	415	310
TMPRSS5	-0.241467	6.42181e-07	8.50369e-06	415	406
MLLT1	-0.241464	6.42454e-07	8.50369e-06	415	415
LOC100190938	-0.241421	6.45472e-07	8.53804e-06	415	415
C14orf93	-0.241325	6.52278e-07	8.60556e-06	415	415
IPO13	-0.241319	6.52712e-07	8.60567e-06	415	415
FKRP	-0.241278	6.55667e-07	8.63584e-06	415	415
C20orf134	-0.241275	6.55855e-07	8.63584e-06	415	415
ARID1B	-0.241187	6.62267e-07	8.70894e-06	415	415
SPAG8	-0.241162	6.64038e-07	8.72655e-06	415	411
FAM189A1	-0.24108	6.70013e-07	8.79936e-06	415	375
PYGO2	-0.241009	6.75304e-07	8.85735e-06	415	415
LOC441208	-0.240917	6.82101e-07	8.94069e-06	415	415
TMEM151B	-0.240821	6.893e-07	9.0117e-06	415	415
WASH7P	-0.240768	6.93324e-07	9.05845e-06	415	415
UBAP2L	-0.24076	6.93941e-07	9.06066e-06	415	415
CADM2	-0.240728	6.96353e-07	9.08628e-06	415	337
CNNM1	-0.240512	7.13011e-07	9.27969e-06	415	415
HSPA12A	-0.240486	7.15074e-07	9.30057e-06	415	415
MOB2	-0.24047	7.16321e-07	9.31079e-06	415	415
CTXN1	-0.240304	7.29432e-07	9.47075e-06	415	415
TEF	-0.24019	7.38518e-07	9.56856e-06	415	415
GTF2IRD2B	-0.240161	7.40898e-07	9.59326e-06	415	415
UCKL1AS	-0.240052	7.49705e-07	9.68249e-06	415	415
MTA1	-0.240003	7.53754e-07	9.72857e-06	415	415
GPR156	-0.239945	7.58513e-07	9.77752e-06	415	342
ENPP3	-0.239864	7.65283e-07	9.8585e-06	415	391
PHF12	-0.239841	7.67155e-07	9.87004e-06	415	415
GIGYF1	-0.239836	7.67644e-07	9.87006e-06	415	415
CTDSP2	-0.239822	7.68806e-07	9.87872e-06	415	415
JPH3	-0.239726	7.76903e-07	9.97642e-06	415	410
PTGER1	-0.23958	7.89325e-07	1.01295e-05	415	413
SOX15	-0.239565	7.9064e-07	1.01399e-05	415	415
C10orf58	-0.239525	7.9403e-07	1.0177e-05	415	415
CABC1	-0.239366	8.07882e-07	1.03439e-05	415	415
FSTL5	-0.239189	8.23606e-07	1.05293e-05	415	246
PIGM	-0.23875	8.63758e-07	1.0994e-05	415	415
UNKL	-0.23868	8.70395e-07	1.10715e-05	415	415
MYOM1	-0.238595	8.78447e-07	1.11389e-05	415	413
EPM2A	-0.238566	8.81226e-07	1.11571e-05	415	415
TAF6	-0.238565	8.81339e-07	1.11571e-05	415	415
SAMD4B	-0.238563	8.81533e-07	1.11571e-05	415	415
LRRC2	-0.238539	8.83833e-07	1.11792e-05	415	412
PHF21B	-0.23852	8.85585e-07	1.11943e-05	415	290
INS-IGF2	-0.238461	8.91311e-07	1.12597e-05	415	153
CDK8	-0.238099	9.26893e-07	1.16873e-05	415	415
KIF3C	-0.238049	9.31929e-07	1.17435e-05	415	415
MYOZ3	-0.237979	9.38984e-07	1.1825e-05	415	407
ZBTB40	-0.237971	9.39853e-07	1.18286e-05	415	415
HOXD11	-0.237849	9.52253e-07	1.1976e-05	415	172
SCAF1	-0.237844	9.5275e-07	1.1976e-05	415	415
CCDC136	-0.237755	9.62029e-07	1.20776e-05	415	415
TNNC2	-0.237746	9.62897e-07	1.2081e-05	415	376
ZNF710	-0.237693	9.68482e-07	1.2136e-05	415	415
ZNF853	-0.237633	9.74728e-07	1.22067e-05	415	415
LOC100128640	-0.237612	9.77009e-07	1.22277e-05	415	415
RUSC2	-0.237267	1.01398e-06	1.2659e-05	415	415
KCNF1	-0.237247	1.01618e-06	1.26788e-05	415	407
C14orf132	-0.237202	1.02111e-06	1.27323e-05	415	415
MAMDC2	-0.237075	1.0352e-06	1.28922e-05	415	413
RASSF10	-0.236979	1.04595e-06	1.2994e-05	415	388
PLCB1	-0.236954	1.0488e-06	1.30215e-05	415	415
ALX3	-0.236884	1.0567e-06	1.31034e-05	415	415
DYRK1B	-0.236814	1.06462e-06	1.31936e-05	415	415
FLJ35024	-0.236738	1.07345e-06	1.32705e-05	415	345
HCG18	-0.236544	1.096e-06	1.3541e-05	415	415
NTN3	-0.236315	1.12324e-06	1.38606e-05	415	345
MYBPHL	-0.236255	1.13049e-06	1.39331e-05	415	278
PPP1R14C	-0.236249	1.13129e-06	1.39344e-05	415	409
IGFBPL1	-0.236075	1.15262e-06	1.41627e-05	415	367
ZMIZ2	-0.236015	1.15999e-06	1.4237e-05	415	415
TMC3	-0.236014	1.16014e-06	1.4237e-05	415	326
SIK2	-0.235978	1.16456e-06	1.4266e-05	415	415
NAT14	-0.235941	1.16929e-06	1.43026e-05	415	415
CLCN6	-0.235921	1.1717e-06	1.43188e-05	415	415
DNAH7	-0.235854	1.18018e-06	1.44138e-05	415	410
SH2B1	-0.235825	1.1839e-06	1.44443e-05	415	415
SUGT1L1	-0.235823	1.18411e-06	1.44443e-05	415	415
BCAN	-0.23561	1.21137e-06	1.4768e-05	415	415
ASH1L	-0.23557	1.21666e-06	1.48235e-05	415	415
PRKCE	-0.235546	1.21978e-06	1.48436e-05	415	415
KIAA1683	-0.23552	1.22318e-06	1.4876e-05	415	415
FAM155B	-0.235509	1.22452e-06	1.48834e-05	415	386
OBP2B	-0.235502	1.22553e-06	1.48838e-05	415	112
KIAA1310	-0.235485	1.22776e-06	1.48959e-05	415	415
C17orf63	-0.235287	1.25399e-06	1.51866e-05	415	415
C13orf38	-0.235281	1.25472e-06	1.51866e-05	415	309
ZC3H4	-0.235243	1.25989e-06	1.524e-05	415	415
CIZ1	-0.235181	1.26828e-06	1.53323e-05	415	415
KIF5A	-0.235128	1.27548e-06	1.54102e-05	415	387
SOX12	-0.235038	1.28768e-06	1.55389e-05	415	415
TBC1D16	-0.234925	1.3033e-06	1.57018e-05	415	415
SP2	-0.234922	1.30379e-06	1.57018e-05	415	415
ACTN1	-0.234787	1.32265e-06	1.58852e-05	415	415
HSPA2	-0.234747	1.32827e-06	1.59432e-05	415	415
LPHN3	-0.234742	1.32908e-06	1.59435e-05	415	415
FBXL18	-0.234731	1.33064e-06	1.59526e-05	415	415
HRH3	-0.234703	1.33461e-06	1.59908e-05	415	194
MC1R	-0.23467	1.33923e-06	1.60271e-05	415	415
C12orf53	-0.23464	1.34348e-06	1.6059e-05	415	414
HOXD10	-0.234575	1.35291e-06	1.61485e-05	415	334
RFX2	-0.234509	1.36236e-06	1.62272e-05	415	415
SLC27A6	-0.23448	1.36661e-06	1.62682e-05	415	331
GATSL1	-0.234457	1.36994e-06	1.62982e-05	415	414
BMPER	-0.234432	1.3736e-06	1.63287e-05	415	406
POU2F1	-0.234421	1.37528e-06	1.63329e-05	415	415
DSTN	-0.234393	1.37927e-06	1.63707e-05	415	415
PCSK2	-0.234242	1.40161e-06	1.66164e-05	415	345
DHX35	-0.234193	1.40892e-06	1.66933e-05	415	415
S100A1	-0.234187	1.40989e-06	1.6695e-05	415	415
SFRS16	-0.234068	1.42787e-06	1.68902e-05	415	415
VN1R1	-0.234067	1.42805e-06	1.68902e-05	415	412
EPPK1	-0.233984	1.44059e-06	1.70186e-05	415	415
LOXL4	-0.233916	1.45101e-06	1.71217e-05	415	415
FIZ1	-0.23391	1.45197e-06	1.7123e-05	415	415
BCAM	-0.233844	1.46225e-06	1.72242e-05	415	415
ZMYM3	-0.233831	1.46426e-06	1.72278e-05	415	415
ILDR2	-0.23373	1.48005e-06	1.73894e-05	415	403
C3orf32	-0.233726	1.48057e-06	1.73894e-05	415	412
ZXDC	-0.233633	1.49522e-06	1.75512e-05	415	415
GRID1	-0.233621	1.49725e-06	1.75649e-05	415	414
ASTN2	-0.233587	1.50266e-06	1.76181e-05	415	415
RIMKLA	-0.23357	1.50537e-06	1.76397e-05	415	413
LOC100130093	-0.233452	1.52424e-06	1.78449e-05	415	415
MT3	-0.23345	1.52465e-06	1.78449e-05	415	261
ZNF335	-0.233283	1.55174e-06	1.8141e-05	415	415
GRIA2	-0.233205	1.56464e-06	1.82812e-05	415	237
PRR12	-0.233185	1.56798e-06	1.83013e-05	415	415
RIMS3	-0.233178	1.56907e-06	1.83013e-05	415	415
C9orf96	-0.232977	1.60284e-06	1.86414e-05	415	408
KGFLP2	-0.232778	1.63693e-06	1.9016e-05	415	415
NUP214	-0.232762	1.63973e-06	1.90376e-05	415	415
HRNBP3	-0.232712	1.64842e-06	1.91275e-05	415	382
KIAA1377	-0.232678	1.65435e-06	1.91744e-05	415	415
GRK1	-0.232636	1.66167e-06	1.92482e-05	415	105
TH	-0.23255	1.67678e-06	1.94009e-05	415	315
ZNF503	-0.232504	1.68494e-06	1.94731e-05	415	415
HOXA5	-0.232486	1.68821e-06	1.94997e-05	415	415
KLK12	-0.232424	1.69919e-06	1.96042e-05	415	320
LOC441177	-0.232401	1.7033e-06	1.96403e-05	415	196
TSPAN18	-0.232275	1.72604e-06	1.9846e-05	415	415
LOC100286844	-0.232115	1.7555e-06	2.01378e-05	415	415
SIK3	-0.23211	1.75639e-06	2.01378e-05	415	415
TMEM55A	-0.232064	1.76488e-06	2.02237e-05	415	415
SMAD9	-0.231925	1.79094e-06	2.0499e-05	415	415
PPP1R14A	-0.231861	1.80296e-06	2.0625e-05	415	415
PTPRS	-0.231808	1.81308e-06	2.0703e-05	415	415
NCRNA00235	-0.231782	1.81813e-06	2.07398e-05	415	364
MICALL1	-0.231699	1.83389e-06	2.08725e-05	415	415
ZNF238	-0.231632	1.84687e-06	2.09848e-05	415	415
WIF1	-0.2316	1.85317e-06	2.10374e-05	415	231
HOXA6	-0.231516	1.86956e-06	2.11949e-05	415	398
MGA	-0.231501	1.87256e-06	2.12171e-05	415	415
CAND2	-0.23145	1.88257e-06	2.13067e-05	415	415
MN1	-0.231431	1.8864e-06	2.1338e-05	415	415
PXMP4	-0.231342	1.90406e-06	2.15137e-05	415	415
KCNH6	-0.23132	1.90838e-06	2.15506e-05	415	319
DMRTC1B	-0.231312	1.90997e-06	2.15565e-05	415	296
TET1	-0.231186	1.93549e-06	2.17837e-05	415	415
LRAT	-0.231125	1.94797e-06	2.19119e-05	415	367
SLC10A4	-0.231059	1.96141e-06	2.20508e-05	415	380
DCUN1D2	-0.230866	2.00145e-06	2.2476e-05	415	415
C1orf230	-0.230837	2.00746e-06	2.2531e-05	415	278
ZDHHC22	-0.230787	2.01814e-06	2.26383e-05	415	234
C4orf31	-0.230749	2.02608e-06	2.27148e-05	415	414
RNF112	-0.230717	2.03301e-06	2.27677e-05	415	406
ZBTB7B	-0.23055	2.06885e-06	2.3154e-05	415	415
ZNF696	-0.230545	2.06984e-06	2.3154e-05	415	415
NPHP4	-0.230503	2.07906e-06	2.32443e-05	415	415
HIF1AN	-0.230443	2.0921e-06	2.337e-05	415	415
TMPRSS13	-0.23044	2.09262e-06	2.337e-05	415	410
RFX6	-0.230416	2.09791e-06	2.34163e-05	415	292
HOXA7	-0.230361	2.11013e-06	2.35397e-05	415	410
ZC3H13	-0.230338	2.1151e-06	2.35821e-05	415	415
PCDH8	-0.230193	2.14733e-06	2.38877e-05	415	316
C3orf47	-0.230009	2.1891e-06	2.43003e-05	415	415
HS6ST3	-0.229978	2.19621e-06	2.43656e-05	415	376
ZNF395	-0.229931	2.2068e-06	2.4437e-05	415	415
C19orf30	-0.229927	2.20774e-06	2.4437e-05	415	161
KIAA0913	-0.229923	2.20869e-06	2.4437e-05	415	415
LASS1	-0.229885	2.21759e-06	2.45221e-05	415	388
FAIM2	-0.229827	2.23107e-06	2.46576e-05	415	412
FAM186B	-0.229752	2.24837e-06	2.48352e-05	415	414
LOC285074	-0.229643	2.27424e-06	2.50936e-05	415	415
SNORD116-20	-0.229607	2.28281e-06	2.51545e-05	415	341
ARHGEF7	-0.229604	2.2835e-06	2.51545e-05	415	415
AGAP1	-0.229518	2.304e-06	2.53528e-05	415	415
LOC150776	-0.229483	2.31224e-06	2.54271e-05	415	415
NCRNA00085	-0.229479	2.31327e-06	2.54271e-05	415	415
INA	-0.22944	2.3226e-06	2.55019e-05	415	406
DAGLA	-0.229425	2.3263e-06	2.55288e-05	415	415
GABRE	-0.229381	2.33695e-06	2.56317e-05	415	415
CNKSR3	-0.229375	2.33846e-06	2.56344e-05	415	415
GGN	-0.229309	2.35454e-06	2.57967e-05	415	415
SLC2A4	-0.229278	2.36222e-06	2.58528e-05	415	415
GLYR1	-0.229237	2.3722e-06	2.5948e-05	415	415
LIG3	-0.229185	2.38524e-06	2.60765e-05	415	415
FAM53A	-0.228724	2.50209e-06	2.72361e-05	415	414
TMEM63C	-0.228571	2.542e-06	2.76557e-05	415	405
PPP1R3C	-0.228465	2.57011e-06	2.79315e-05	415	415
AXIN2	-0.228448	2.57472e-06	2.79515e-05	415	415
LPA	-0.228409	2.58513e-06	2.80484e-05	415	224
GATAD2B	-0.228404	2.58642e-06	2.80484e-05	415	415
LRRC23	-0.228379	2.59324e-06	2.81073e-05	415	415
TUB	-0.228355	2.5997e-06	2.81622e-05	415	415
TMEM74	-0.22833	2.60637e-06	2.82194e-05	415	387
SHANK2	-0.228305	2.61322e-06	2.82784e-05	415	415
SEPT5	-0.228184	2.64608e-06	2.86187e-05	415	415
YY1AP1	-0.228138	2.6585e-06	2.87223e-05	415	415
ST5	-0.228123	2.66269e-06	2.87522e-05	415	415
LRRN1	-0.228071	2.67714e-06	2.88928e-05	415	411
EPHB1	-0.228019	2.69158e-06	2.90332e-05	415	414
TTLL7	-0.227908	2.72264e-06	2.93525e-05	415	415
DCHS2	-0.227835	2.74324e-06	2.95589e-05	415	410
KIAA0406	-0.227731	2.77289e-06	2.98466e-05	415	415
CHADL	-0.227629	2.80225e-06	3.00985e-05	415	415
CACHD1	-0.227506	2.83798e-06	3.04499e-05	415	415
SPEN	-0.227469	2.84877e-06	3.05495e-05	415	415
MAP3K9	-0.227287	2.90272e-06	3.10951e-05	415	415
SYT2	-0.227235	2.91831e-06	3.1229e-05	415	414
GPR56	-0.227045	2.97612e-06	3.18308e-05	415	415
KIAA1549	-0.227015	2.98511e-06	3.19101e-05	415	415
SCGB1D2	-0.226962	3.00142e-06	3.20674e-05	415	34
BHLHB9	-0.226957	3.0031e-06	3.20684e-05	415	415
CAMKK1	-0.226931	3.01104e-06	3.21363e-05	415	415
TTLL2	-0.226903	3.01979e-06	3.21957e-05	415	378
AKAP6	-0.226851	3.03596e-06	3.2334e-05	415	415
KDM5B	-0.226833	3.04175e-06	3.23786e-05	415	415
ABHD1	-0.226749	3.06807e-06	3.26245e-05	415	407
ASPSCR1	-0.226719	3.07761e-06	3.27087e-05	415	415
STXBP5L	-0.226697	3.08446e-06	3.27643e-05	415	374
SMG5	-0.226454	3.16249e-06	3.34701e-05	415	415
NACAD	-0.22635	3.19645e-06	3.37589e-05	415	415
KSR1	-0.226329	3.20328e-06	3.38133e-05	415	415
PEX19	-0.226293	3.21515e-06	3.39032e-05	415	415
CNIH2	-0.226127	3.27026e-06	3.44126e-05	415	415
APBB1	-0.226072	3.28895e-06	3.45913e-05	415	415
USP20	-0.226043	3.29849e-06	3.46555e-05	415	415
SCRN1	-0.226033	3.30191e-06	3.46735e-05	415	415
SLC7A2	-0.225959	3.32697e-06	3.49004e-05	415	415
DVL2	-0.225896	3.34875e-06	3.50925e-05	415	415
PACSIN3	-0.225751	3.39881e-06	3.55801e-05	415	415
LOC149837	-0.225742	3.40196e-06	3.55948e-05	415	415
LY6G6F	-0.225718	3.41024e-06	3.56629e-05	415	157
ARHGEF10L	-0.225528	3.47693e-06	3.62666e-05	415	415
ATP9A	-0.225493	3.48948e-06	3.63599e-05	415	415
TEX15	-0.225379	3.53045e-06	3.6768e-05	415	328
MSI1	-0.225327	3.54915e-06	3.69437e-05	415	414
EHMT2	-0.225177	3.60418e-06	3.74586e-05	415	415
KCTD8	-0.225153	3.61303e-06	3.75313e-05	415	286
TLN1	-0.225128	3.62204e-06	3.76056e-05	415	415
TTLL5	-0.225118	3.62587e-06	3.76223e-05	415	415
RANBP10	-0.225114	3.62736e-06	3.76223e-05	415	415
AMMECR1L	-0.225056	3.64879e-06	3.78251e-05	415	415
CNTFR	-0.22505	3.65104e-06	3.7829e-05	415	392
YLPM1	-0.225045	3.65306e-06	3.78306e-05	415	415
INSM1	-0.224946	3.69004e-06	3.81939e-05	415	405
DNER	-0.224916	3.70128e-06	3.82907e-05	415	381
EPB41L5	-0.224887	3.71229e-06	3.8385e-05	415	415
SPAG17	-0.224822	3.73688e-06	3.85998e-05	415	353
REPS1	-0.224786	3.75078e-06	3.87038e-05	415	415
NCS1	-0.224737	3.76954e-06	3.88776e-05	415	415
MEX3A	-0.22472	3.77601e-06	3.89201e-05	415	415
PCYOX1	-0.224612	3.81776e-06	3.93147e-05	415	415
LRRC43	-0.22457	3.83398e-06	3.94374e-05	415	389
CELSR2	-0.224539	3.84612e-06	3.95263e-05	415	415
PROX1	-0.224504	3.85995e-06	3.96483e-05	415	414
KIF1B	-0.224425	3.89086e-06	3.99252e-05	415	415
LRRC4	-0.224404	3.89914e-06	3.99899e-05	415	415
TEX261	-0.224388	3.90549e-06	4.00348e-05	415	415
ARAP3	-0.224375	3.91094e-06	4.00523e-05	415	415
TMEM132B	-0.224342	3.92408e-06	4.01573e-05	415	413
ZIM2	-0.224312	3.93591e-06	4.02446e-05	415	223
TMEFF2	-0.224273	3.9517e-06	4.03448e-05	415	296
LOC646762	-0.224266	3.95427e-06	4.03507e-05	415	415
ZFYVE20	-0.224224	3.97135e-06	4.05045e-05	415	415
COBL	-0.224166	3.99488e-06	4.07064e-05	415	415
ITFG3	-0.224165	3.99516e-06	4.07064e-05	415	415
KRTAP5-5	-0.224084	4.02809e-06	4.09799e-05	415	299
RASA4P	-0.224028	4.05123e-06	4.11595e-05	415	415
LRRTM1	-0.223989	4.06707e-06	4.12727e-05	415	323
CLDN10	-0.223975	4.07313e-06	4.13135e-05	415	335
PLA2G6	-0.223954	4.08179e-06	4.13805e-05	415	415
RGP1	-0.223914	4.09821e-06	4.15054e-05	415	415
COL11A2	-0.223902	4.10349e-06	4.15381e-05	415	413
C1orf198	-0.223714	4.18233e-06	4.22094e-05	415	415
CAMK2G	-0.223644	4.21227e-06	4.2448e-05	415	415
CTF1	-0.223548	4.25336e-06	4.28248e-05	415	415
MOCS3	-0.223546	4.25389e-06	4.28248e-05	415	415
LOC100271722	-0.223537	4.25786e-06	4.28434e-05	415	413
RTL1	-0.22347	4.28707e-06	4.30944e-05	415	304
IFT140	-0.223402	4.31665e-06	4.33271e-05	415	415
OTUD7A	-0.223382	4.32547e-06	4.33941e-05	415	414
EXTL3	-0.223349	4.33977e-06	4.34945e-05	415	415
RGS9BP	-0.22334	4.34376e-06	4.35129e-05	415	398
KHNYN	-0.223329	4.34877e-06	4.35415e-05	415	415
PCDH20	-0.223284	4.36829e-06	4.37153e-05	415	403
LOC145837	-0.223263	4.3778e-06	4.37888e-05	415	383
EBF4	-0.223217	4.39803e-06	4.39694e-05	415	415
C6orf176	-0.223162	4.42275e-06	4.41729e-05	415	374
PREPL	-0.223145	4.43026e-06	4.42261e-05	415	415
C20orf135	-0.223073	4.46284e-06	4.45074e-05	415	415
KIAA1383	-0.222962	4.51312e-06	4.49866e-05	415	415
DCAF12L2	-0.222904	4.53966e-06	4.51844e-05	415	275
MATN2	-0.222892	4.54515e-06	4.52167e-05	415	415
SRRM4	-0.222866	4.55689e-06	4.5289e-05	415	289
KLK13	-0.222736	4.61708e-06	4.58421e-05	415	369
CACNA1C	-0.222723	4.62342e-06	4.58826e-05	415	415
KLC4	-0.222715	4.62699e-06	4.58954e-05	415	415
C8orf51	-0.222697	4.63544e-06	4.59343e-05	415	413
SEZ6L	-0.22269	4.63872e-06	4.59443e-05	415	357
AQP7	-0.222633	4.66549e-06	4.61641e-05	415	406
SLIT1	-0.222625	4.66923e-06	4.61785e-05	415	411
SHROOM4	-0.222468	4.74364e-06	4.68687e-05	415	415
LOC493754	-0.222306	4.82173e-06	4.75937e-05	415	415
TMEM43	-0.222133	4.90622e-06	4.83569e-05	415	415
LTB4R2	-0.222095	4.9254e-06	4.85223e-05	415	415
FAM22A	-0.222087	4.92927e-06	4.85368e-05	415	415
IRS2	-0.222038	4.95351e-06	4.8728e-05	415	415
HOXC12	-0.221958	4.99353e-06	4.90978e-05	415	193
WDR17	-0.221939	5.00304e-06	4.91586e-05	415	404
PRLHR	-0.221725	5.11184e-06	5.01878e-05	415	204
HS6ST2	-0.221686	5.13203e-06	5.03616e-05	415	404
SF1	-0.221635	5.15859e-06	5.05732e-05	415	415
FOXI2	-0.221586	5.18383e-06	5.0796e-05	415	316
LOC100133161	-0.221497	5.2305e-06	5.12037e-05	415	415
LTBP4	-0.221488	5.23493e-06	5.12223e-05	415	415
USH1G	-0.221415	5.27368e-06	5.15765e-05	415	298
NOVA1	-0.221386	5.28905e-06	5.17018e-05	415	415
GDF7	-0.221264	5.35414e-06	5.23128e-05	415	341
DNAJC6	-0.221205	5.38556e-06	5.2569e-05	415	415
STK36	-0.2212	5.38829e-06	5.25703e-05	415	415
SBK1	-0.221115	5.43438e-06	5.29434e-05	415	415
KIAA1704	-0.221087	5.44975e-06	5.30675e-05	415	415
C19orf55	-0.22106	5.46452e-06	5.31857e-05	415	415
ABCC2	-0.221049	5.47064e-06	5.32197e-05	415	412
ASXL3	-0.220898	5.55404e-06	5.39791e-05	415	402
NRSN2	-0.220553	5.74853e-06	5.57621e-05	415	415
SEPT7L	-0.220529	5.76256e-06	5.58714e-05	415	286
ZNF595	-0.220512	5.77219e-06	5.5938e-05	415	415
C2orf70	-0.220414	5.8293e-06	5.64644e-05	415	391
FOXK1	-0.220392	5.84207e-06	5.6561e-05	415	415
FGF9	-0.220351	5.86615e-06	5.67076e-05	415	408
KLHL30	-0.220348	5.86761e-06	5.67076e-05	415	411
ZNF213	-0.220347	5.86843e-06	5.67076e-05	415	415
GALNTL1	-0.220289	5.90229e-06	5.70075e-05	415	415
RXRA	-0.220224	5.9405e-06	5.73219e-05	415	415
MTHFSD	-0.220208	5.95052e-06	5.73911e-05	415	415
DRD4	-0.219989	6.08128e-06	5.85686e-05	415	413
PBX2	-0.219958	6.10019e-06	5.87226e-05	415	415
NBPF3	-0.219923	6.12182e-06	5.89029e-05	415	415
PTP4A3	-0.219865	6.15703e-06	5.91815e-05	415	415
ANGEL1	-0.219863	6.1584e-06	5.91815e-05	415	415
PCSK1	-0.219861	6.15956e-06	5.91815e-05	415	407
SNAP25	-0.219807	6.19263e-06	5.94427e-05	415	405
FREM1	-0.219614	6.31311e-06	6.04844e-05	415	401
ZNF775	-0.219572	6.33906e-06	6.07043e-05	415	415
SLC38A11	-0.219499	6.38531e-06	6.10893e-05	415	400
DNMT3A	-0.21947	6.40386e-06	6.12379e-05	415	415
QPRT	-0.219411	6.44142e-06	6.15653e-05	415	415
MED12	-0.219407	6.44419e-06	6.15653e-05	415	415
ZMIZ1	-0.219322	6.49889e-06	6.19707e-05	415	415
SUN1	-0.219303	6.51122e-06	6.2027e-05	415	415
GPR37	-0.219252	6.54441e-06	6.21996e-05	415	408
TUBB3	-0.219226	6.56117e-06	6.23003e-05	415	415
NAT8L	-0.219211	6.57091e-06	6.23636e-05	415	406
ZCCHC12	-0.219138	6.61887e-06	6.27304e-05	415	399
BEGAIN	-0.219099	6.6447e-06	6.29162e-05	415	415
ARHGEF19	-0.219077	6.65911e-06	6.30231e-05	415	415
KCTD7	-0.218978	6.72466e-06	6.35905e-05	415	415
TSPYL2	-0.218977	6.72535e-06	6.35905e-05	415	415
RHOBTB3	-0.21895	6.7431e-06	6.37286e-05	415	415
KCNMB4	-0.218902	6.77551e-06	6.40049e-05	415	415
TLE3	-0.218868	6.79858e-06	6.4193e-05	415	415
LOC100132215	-0.218839	6.81789e-06	6.43452e-05	415	414
SPATA4	-0.218796	6.84718e-06	6.45474e-05	415	189
CES1	-0.218793	6.84888e-06	6.45474e-05	415	411
SBF1	-0.218759	6.87219e-06	6.47369e-05	415	415
CYB561D1	-0.218748	6.87955e-06	6.4776e-05	415	415
HOXB8	-0.218674	6.93016e-06	6.51919e-05	415	404
PPP1R12C	-0.218658	6.94161e-06	6.52389e-05	415	415
TLE2	-0.2186	6.98124e-06	6.55504e-05	415	415
RMND5A	-0.218569	7.00296e-06	6.56629e-05	415	415
LOC100133331	-0.218529	7.03054e-06	6.58909e-05	415	415
SLITRK3	-0.218451	7.08478e-06	6.63091e-05	415	321
CADPS	-0.218451	7.08499e-06	6.63091e-05	415	402
FOXF2	-0.218374	7.1392e-06	6.67547e-05	415	415
KL	-0.218366	7.14469e-06	6.67751e-05	415	415
PID1	-0.218152	7.29776e-06	6.81742e-05	415	415
ZER1	-0.218071	7.35626e-06	6.86256e-05	415	415
TSC22D2	-0.218016	7.39629e-06	6.89355e-05	415	415
LRTM2	-0.217999	7.40892e-06	6.90214e-05	415	240
FBXO41	-0.217973	7.42781e-06	6.91336e-05	415	415
ADAMTS17	-0.217921	7.46607e-06	6.94578e-05	415	415
TMEM59L	-0.217909	7.47502e-06	6.95034e-05	415	390
C20orf201	-0.217775	7.57422e-06	7.03432e-05	415	283
EPN2	-0.217677	7.64784e-06	7.09855e-05	415	415
VPS52	-0.217606	7.70189e-06	7.14544e-05	415	415
PACS2	-0.217585	7.71721e-06	7.15309e-05	415	415
NPHP1	-0.217579	7.72193e-06	7.15419e-05	415	415
GNG3	-0.217496	7.7854e-06	7.2031e-05	415	409
B4GALNT4	-0.217473	7.80343e-06	7.21648e-05	415	401
KCNH1	-0.217446	7.82376e-06	7.23197e-05	415	410
BGLAP	-0.217439	7.82945e-06	7.23392e-05	415	415
SYCE1L	-0.217381	7.87436e-06	7.26878e-05	415	397
C17orf103	-0.217373	7.88017e-06	7.27082e-05	415	415
VWC2	-0.217287	7.94746e-06	7.32622e-05	415	315
RCOR3	-0.217076	8.11388e-06	7.46943e-05	415	415
WDR31	-0.21704	8.14273e-06	7.49258e-05	415	415
GABRG2	-0.217015	8.16297e-06	7.50778e-05	415	214
GBF1	-0.216964	8.2037e-06	7.53838e-05	415	415
DHX34	-0.216949	8.21623e-06	7.54647e-05	415	415
LOC388588	-0.216916	8.24262e-06	7.56727e-05	415	411
TTLL11	-0.216893	8.26099e-06	7.57382e-05	415	415
LOC100287227	-0.21683	8.31276e-06	7.61783e-05	415	415
LOC100170939	-0.216644	8.46586e-06	7.7476e-05	415	415
VWDE	-0.216635	8.47333e-06	7.75093e-05	415	298
GATS	-0.216604	8.49926e-06	7.77113e-05	415	415
ADCY5	-0.216597	8.50473e-06	7.77262e-05	415	414
KDM6B	-0.216517	8.57173e-06	7.83032e-05	415	415
FBXO31	-0.216503	8.58372e-06	7.83773e-05	415	415
HTN1	-0.216484	8.59948e-06	7.84858e-05	415	37
SPIN3	-0.216466	8.61485e-06	7.85906e-05	415	415
ZBTB10	-0.216443	8.63417e-06	7.86958e-05	415	415
MAML3	-0.216413	8.65929e-06	7.88892e-05	415	415
C9orf3	-0.216401	8.66935e-06	7.89454e-05	415	415
C2orf16	-0.216191	8.8499e-06	8.05169e-05	415	415
FBXO21	-0.216079	8.94747e-06	8.1222e-05	415	415
ZSWIM1	-0.215998	9.01835e-06	8.17553e-05	415	415
TRIM17	-0.215969	9.04463e-06	8.19568e-05	415	412
TRIM8	-0.215926	9.08241e-06	8.22319e-05	415	415
GPAM	-0.215891	9.11366e-06	8.23977e-05	415	415
LARP6	-0.215786	9.20741e-06	8.32081e-05	415	415
WNK4	-0.215761	9.23044e-06	8.3379e-05	415	415
AKD1	-0.215744	9.24547e-06	8.34775e-05	415	415
RABGAP1	-0.215703	9.28269e-06	8.37388e-05	415	415
CHGA	-0.215619	9.35921e-06	8.43914e-05	415	375
ZNF445	-0.215602	9.3741e-06	8.44881e-05	415	415
MLXIP	-0.215511	9.45795e-06	8.52058e-05	415	415
CTXN2	-0.215501	9.46702e-06	8.52496e-05	415	120
ENTPD3	-0.215432	9.53151e-06	8.57539e-05	415	410
SUPT6H	-0.215424	9.53889e-06	8.57821e-05	415	415
RBM38	-0.215385	9.5754e-06	8.59576e-05	415	415
SV2A	-0.215376	9.5839e-06	8.59957e-05	415	415
GALR2	-0.215344	9.61364e-06	8.62243e-05	415	405
KIAA0355	-0.215261	9.69133e-06	8.68441e-05	415	415
MORN5	-0.215203	9.74684e-06	8.72642e-05	415	252
PCDHB18	-0.215166	9.78206e-06	8.75408e-05	415	410
LRP4	-0.214997	9.94427e-06	8.89137e-05	415	415
RASD2	-0.214951	9.98905e-06	8.92747e-05	415	415
CNTN1	-0.214905	1.00339e-05	8.95963e-05	415	386
C20orf200	-0.214881	1.00569e-05	8.9762e-05	415	369
CUL9	-0.21487	1.0068e-05	8.98217e-05	415	415
MBD6	-0.214839	1.00986e-05	9.0055e-05	415	415
FAM22D	-0.214826	1.01114e-05	9.00811e-05	415	415
ASTN1	-0.214822	1.01149e-05	9.00811e-05	415	341
NEUROD1	-0.214787	1.01492e-05	9.03469e-05	415	293
ABCC10	-0.21468	1.0256e-05	9.11766e-05	415	415
ZNF362	-0.21458	1.03552e-05	9.20157e-05	415	415
CSNK1D	-0.214576	1.03594e-05	9.20157e-05	415	415
C1orf89	-0.214526	1.04104e-05	9.24278e-05	415	415
RMND5B	-0.214495	1.04416e-05	9.26238e-05	415	415
NRSN1	-0.214445	1.04922e-05	9.3031e-05	415	255
WSCD1	-0.214426	1.05116e-05	9.31629e-05	415	415
CUX1	-0.214344	1.05962e-05	9.38712e-05	415	415
PDE8B	-0.214158	1.07891e-05	9.54134e-05	415	415
REEP2	-0.214032	1.0921e-05	9.64407e-05	415	414
SLC2A11	-0.214029	1.09244e-05	9.64407e-05	415	415
PPP1CB	-0.213987	1.09685e-05	9.67875e-05	415	415
SRRM3	-0.213878	1.10849e-05	9.773e-05	415	415
AMOTL1	-0.213857	1.11077e-05	9.7888e-05	415	415
2023-03-11	-0.213822	1.11459e-05	9.80963e-05	415	103
KIAA0802	-0.213788	1.1182e-05	9.83712e-05	415	415
C1orf192	-0.213711	1.1266e-05	9.90246e-05	415	414
AS3MT	-0.213686	1.1293e-05	9.91753e-05	415	415
NGB	-0.21351	1.14868e-05	0.000100834	415	158
EEPD1	-0.213486	1.15137e-05	0.000101026	415	415
ATP2B3	-0.21346	1.15427e-05	0.000101236	415	208
RBPMS	-0.213438	1.15678e-05	0.000101412	415	415
BRD4	-0.213433	1.15734e-05	0.000101418	415	415
RAB9B	-0.213353	1.16626e-05	0.000102067	415	402
SLC35E2	-0.213232	1.17996e-05	0.000103132	415	415
EMP2	-0.21322	1.18135e-05	0.000103208	415	415
LOC400931	-0.213175	1.18646e-05	0.000103611	415	415
XKR6	-0.213162	1.18794e-05	0.000103694	415	414
RPS6KA6	-0.213154	1.18888e-05	0.000103707	415	323
C20orf165	-0.213152	1.1891e-05	0.000103707	415	408
NCRNA00175	-0.213143	1.19017e-05	0.000103755	415	328
NFIX	-0.21313	1.1917e-05	0.000103799	415	415
CLCNKB	-0.213108	1.19418e-05	0.00010397	415	254
PIP5K1C	-0.212974	1.20969e-05	0.000105185	415	415
SYNJ2	-0.212949	1.21262e-05	0.000105395	415	415
ZNF500	-0.212815	1.22837e-05	0.000106626	415	415
INTS3	-0.212799	1.23032e-05	0.000106749	415	415
SUN2	-0.212784	1.23205e-05	0.000106853	415	415
F2	-0.212663	1.24656e-05	0.000108065	415	270
TSPAN5	-0.212438	1.27376e-05	0.000110141	415	415
GJC3	-0.212369	1.2823e-05	0.000110689	415	329
KCNC4	-0.212321	1.28821e-05	0.000111106	415	415
TMEM132E	-0.212317	1.28877e-05	0.000111106	415	407
LOC100190939	-0.212317	1.28877e-05	0.000111106	415	415
BEX1	-0.212245	1.29763e-05	0.000111774	415	356
GPR26	-0.212205	1.30267e-05	0.00011216	415	269
RGS11	-0.212136	1.31136e-05	0.000112861	415	413
RNF38	-0.212053	1.32178e-05	0.000113709	415	415
ERC1	-0.212023	1.32568e-05	0.000113996	415	415
ADAM33	-0.21199	1.32985e-05	0.000114306	415	414
CAMK2B	-0.211915	1.33939e-05	0.000115077	415	390
CNST	-0.211881	1.34378e-05	0.000115405	415	415
C6orf27	-0.211836	1.34962e-05	0.00011571	415	414
HIF3A	-0.211772	1.35793e-05	0.000116324	415	415
TULP1	-0.211616	1.37834e-05	0.000117946	415	348
ACR	-0.211614	1.37862e-05	0.000117946	415	351
DCHS1	-0.211592	1.38153e-05	0.000118145	415	415
GNL1	-0.21158	1.38322e-05	0.00011824	415	415
DEPDC7	-0.211552	1.38691e-05	0.000118506	415	413
GCK	-0.211545	1.38781e-05	0.000118532	415	394
GJB6	-0.211539	1.38855e-05	0.000118545	415	369
GPR179	-0.211456	1.39966e-05	0.000119393	415	389
FLJ44606	-0.211383	1.4095e-05	0.000120182	415	415
FLNC	-0.211355	1.41329e-05	0.000120352	415	415
LOC148189	-0.211343	1.41484e-05	0.000120434	415	415
C20orf166	-0.211324	1.41755e-05	0.000120614	415	105
DEXI	-0.211291	1.42198e-05	0.000120889	415	415
EIF4G3	-0.211203	1.43399e-05	0.000121859	415	415
SNORA81	-0.211163	1.43943e-05	0.000122219	415	375
SYPL2	-0.211096	1.44869e-05	0.000122901	415	414
ZNF133	-0.211069	1.45242e-05	0.000123166	415	415
C6orf174	-0.21105	1.45514e-05	0.000123345	415	415
GREM2	-0.211037	1.45687e-05	0.000123441	415	406
H19	-0.210835	1.4853e-05	0.000125638	415	415
KLC1	-0.210798	1.49055e-05	0.00012603	415	415
EEF1A2	-0.21079	1.49167e-05	0.000126072	415	406
SOX5	-0.210733	1.49976e-05	0.000126703	415	413
BAT4	-0.210705	1.50388e-05	0.000126998	415	415
C15orf62	-0.210673	1.50836e-05	0.00012727	415	415
PLAGL2	-0.21065	1.51173e-05	0.000127501	415	415
ACACB	-0.210628	1.51496e-05	0.000127721	415	415
RSPO4	-0.210622	1.5158e-05	0.000127738	415	376
FADS6	-0.210565	1.52399e-05	0.000128214	415	259
UBR4	-0.210545	1.52693e-05	0.000128408	415	415
CCDC142	-0.210526	1.52974e-05	0.000128497	415	415
C2orf73	-0.210525	1.5299e-05	0.000128497	415	219
SCG3	-0.21052	1.53059e-05	0.000128503	415	381
PTPRN	-0.210427	1.54418e-05	0.000129482	415	397
NHSL1	-0.21041	1.54667e-05	0.000129637	415	415
LOC253039	-0.210393	1.5493e-05	0.000129804	415	415
FAM131C	-0.210348	1.5559e-05	0.000130249	415	371
CCDC48	-0.210323	1.55962e-05	0.000130506	415	415
SLC26A10	-0.210255	1.56974e-05	0.000131244	415	397
NCRNA00182	-0.210179	1.58114e-05	0.000132034	415	415
PPP2R1A	-0.210146	1.58613e-05	0.000132341	415	415
CCDC92	-0.210132	1.58818e-05	0.000132458	415	415
PRSS42	-0.210048	1.6009e-05	0.000133354	415	71
USP19	-0.209914	1.62143e-05	0.000134952	415	415
NXPH3	-0.20989	1.62515e-05	0.000135206	415	414
SORBS1	-0.209829	1.63464e-05	0.00013594	415	415
HLF	-0.209783	1.64182e-05	0.000136481	415	415
CDK5RAP2	-0.209708	1.65357e-05	0.000137288	415	415
UNC119B	-0.209701	1.65457e-05	0.000137315	415	415
MLLT4	-0.209661	1.66083e-05	0.000137778	415	415
CACNB2	-0.209619	1.66756e-05	0.000138223	415	415
SLC22A17	-0.209572	1.67501e-05	0.000138783	415	415
KCNB1	-0.209425	1.69857e-05	0.000140563	415	368
BTBD9	-0.209296	1.71935e-05	0.000142063	415	415
SDK2	-0.209295	1.7195e-05	0.000142063	415	414
LY6G6E	-0.209223	1.73141e-05	0.000142948	415	136
PLEKHA4	-0.209217	1.73234e-05	0.000142948	415	415
POM121	-0.209166	1.74074e-05	0.000143582	415	415
FAM171A2	-0.209059	1.75838e-05	0.000144978	415	415
CNFN	-0.208876	1.7892e-05	0.00014728	415	415
ZBTB3	-0.20879	1.80374e-05	0.000148399	415	415
ANKRD43	-0.208779	1.80566e-05	0.000148439	415	414
SORCS3	-0.208775	1.80622e-05	0.000148439	415	257
CNTN2	-0.208764	1.80823e-05	0.000148544	415	388
BRD1	-0.208709	1.81761e-05	0.000149253	415	415
DENND4B	-0.208664	1.82533e-05	0.000149826	415	415
SERTAD4	-0.208637	1.82997e-05	0.000150025	415	415
NOV	-0.208579	1.84004e-05	0.000150728	415	415
FUZ	-0.208569	1.84177e-05	0.000150809	415	415
PHGDH	-0.208501	1.85374e-05	0.000151683	415	415
SATL1	-0.208499	1.85394e-05	0.000151683	415	415
LOC285033	-0.208398	1.87176e-05	0.000152893	415	415
LGI1	-0.20838	1.87492e-05	0.000153089	415	276
LRRC14	-0.208238	1.90027e-05	0.000155034	415	415
LOC650623	-0.208227	1.90219e-05	0.000155128	415	415
CSNK2A2	-0.208144	1.91706e-05	0.000156278	415	415
TRIM3	-0.208125	1.92058e-05	0.000156448	415	415
EPHA6	-0.208122	1.92102e-05	0.000156448	415	294
SDK1	-0.20812	1.92147e-05	0.000156448	415	415
KCNK15	-0.208098	1.92554e-05	0.000156716	415	401
BOK	-0.208079	1.9289e-05	0.000156927	415	415
PHACTR3	-0.208065	1.93141e-05	0.000156994	415	394
CFC1B	-0.208062	1.93205e-05	0.000156994	415	187
C3orf49	-0.208049	1.93436e-05	0.000157118	415	306
SYN1	-0.208016	1.94045e-05	0.00015755	415	415
C14orf174	-0.208007	1.94201e-05	0.000157613	415	413
RYR3	-0.207905	1.96074e-05	0.000158901	415	415
NPAS4	-0.207899	1.9618e-05	0.000158901	415	351
ZNF346	-0.20784	1.97273e-05	0.000159658	415	415
WASH2P	-0.207797	1.98087e-05	0.000160188	415	415
PTH1R	-0.207727	1.99397e-05	0.000161153	415	401
CBX5	-0.207724	1.99439e-05	0.000161153	415	415
LDOC1	-0.207683	2.00217e-05	0.000161652	415	415
IGDCC3	-0.207582	2.02132e-05	0.000163003	415	337
TGM3	-0.207502	2.03646e-05	0.000164159	415	384
MOCS1	-0.207388	2.05833e-05	0.00016579	415	415
C22orf23	-0.207377	2.06046e-05	0.000165895	415	415
CALCB	-0.207349	2.06593e-05	0.000166203	415	187
LRSAM1	-0.207344	2.06688e-05	0.000166213	415	415
PFN2	-0.20722	2.09117e-05	0.000168033	415	415
MT4	-0.207147	2.10556e-05	0.000169055	415	11
ABLIM2	-0.207025	2.12971e-05	0.00017089	415	415
HEATR4	-0.207023	2.13011e-05	0.00017089	415	399
CAMSAP1	-0.207012	2.13226e-05	0.000170927	415	415
C4orf12	-0.206943	2.14618e-05	0.000171975	415	413
KRT31	-0.206918	2.15115e-05	0.000172305	415	74
MYL6B	-0.206884	2.15808e-05	0.000172791	415	415
PGBD1	-0.206858	2.16338e-05	0.000173148	415	415
BCL2L10	-0.206849	2.16511e-05	0.000173218	415	367
FMN2	-0.206737	2.18801e-05	0.000174911	415	379
KCNG1	-0.206723	2.19086e-05	0.000175069	415	414
C6orf25	-0.206715	2.19242e-05	0.000175125	415	282
FRAS1	-0.2067	2.19549e-05	0.000175301	415	415
ANKH	-0.2066	2.21614e-05	0.00017688	415	415
ANKRD53	-0.206593	2.21769e-05	0.000176901	415	414
AIRE	-0.20659	2.21815e-05	0.000176901	415	273
ARL10	-0.206565	2.22348e-05	0.000177256	415	414
NPPC	-0.206542	2.22829e-05	0.00017757	415	252
NIPAL4	-0.206466	2.24415e-05	0.000178763	415	409
FAM66C	-0.20637	2.26426e-05	0.000180081	415	412
FOXP2	-0.20636	2.26649e-05	0.000180188	415	408
LOC145783	-0.206291	2.28119e-05	0.000181286	415	413
FGF13	-0.206173	2.30636e-05	0.00018307	415	415
CNTNAP5	-0.206125	2.31676e-05	0.000183753	415	211
KIAA0240	-0.206125	2.31679e-05	0.000183753	415	415
KRT40	-0.20609	2.32422e-05	0.00018427	415	224
ITPKB	-0.206065	2.32977e-05	0.000184638	415	415
KIAA1161	-0.206038	2.33551e-05	0.000184948	415	415
EYS	-0.205993	2.3454e-05	0.000185658	415	415
LRP3	-0.205954	2.3539e-05	0.000186258	415	415
IRAK1BP1	-0.205939	2.35736e-05	0.000186447	415	415
ETV4	-0.205935	2.35813e-05	0.000186447	415	415
HYDIN	-0.205844	2.37826e-05	0.000187672	415	410
LARGE	-0.205791	2.39006e-05	0.000188529	415	415
SLC34A3	-0.205751	2.39903e-05	0.000189163	415	407
BZRAP1	-0.205688	2.41295e-05	0.000190078	415	415
CALCOCO1	-0.205686	2.41345e-05	0.000190078	415	415
SLC7A3	-0.205667	2.41773e-05	0.000190267	415	267
ARHGEF17	-0.20566	2.41932e-05	0.000190318	415	415
THADA	-0.205627	2.42674e-05	0.000190827	415	415
RAB6B	-0.205621	2.42812e-05	0.000190862	415	415
RIMKLB	-0.205614	2.4297e-05	0.000190912	415	415
RBM24	-0.205603	2.43233e-05	0.000191045	415	414
WFIKKN2	-0.205588	2.43556e-05	0.000191156	415	337
PIGZ	-0.205588	2.43564e-05	0.000191156	415	415
CYB5RL	-0.20552	2.45099e-05	0.000192286	415	415
MAP3K4	-0.205502	2.45513e-05	0.000192536	415	415
SLC30A2	-0.205428	2.47219e-05	0.000193724	415	358
TAF1C	-0.205404	2.47763e-05	0.000194075	415	415
PCDHAC2	-0.205381	2.48287e-05	0.000194333	415	401
PRKG2	-0.205377	2.48381e-05	0.000194333	415	399
TFDP2	-0.205331	2.49459e-05	0.000195101	415	415
CCDC102A	-0.205295	2.50282e-05	0.000195669	415	415
TNFRSF19	-0.205288	2.50443e-05	0.000195719	415	415
ALPK3	-0.205275	2.50769e-05	0.000195898	415	415
CCDC24	-0.205261	2.51085e-05	0.000196069	415	415
LAPTM4B	-0.205242	2.51533e-05	0.000196267	415	415
EFCAB6	-0.205226	2.51897e-05	0.000196476	415	410
CEACAM19	-0.205218	2.52095e-05	0.000196554	415	415
SOHLH2	-0.205206	2.52379e-05	0.0001967	415	313
TRIO	-0.205184	2.5288e-05	0.000197015	415	415
NAPB	-0.205175	2.53109e-05	0.000197117	415	415
GFAP	-0.205161	2.53424e-05	0.000197223	415	379
SKI	-0.20516	2.5344e-05	0.000197223	415	415
VPS37D	-0.205107	2.54702e-05	0.000198052	415	415
HOXD1	-0.205037	2.56365e-05	0.000199269	415	415
PRIMA1	-0.204987	2.57557e-05	0.000200118	415	403
RET	-0.204949	2.58459e-05	0.000200588	415	412
MAML1	-0.204879	2.60155e-05	0.00020175	415	415
ZNF418	-0.204797	2.62143e-05	0.000203213	415	413
PRPF6	-0.204728	2.63819e-05	0.000204278	415	415
TMPRSS6	-0.204679	2.65019e-05	0.000205001	415	406
KLHL23	-0.204677	2.65057e-05	0.000205001	415	415
ECE1	-0.204613	2.66638e-05	0.000206066	415	415
SOX13	-0.204587	2.67278e-05	0.000206482	415	415
LOC388152	-0.204572	2.67654e-05	0.000206694	415	415
ZSCAN1	-0.20455	2.68201e-05	0.000207037	415	286
TBX4	-0.20445	2.70698e-05	0.000208805	415	341
MTMR12	-0.204397	2.72019e-05	0.000209664	415	415
FOXO4	-0.204379	2.72488e-05	0.000209946	415	415
SNTB1	-0.20434	2.73476e-05	0.000210557	415	415
SIX5	-0.204339	2.7349e-05	0.000210557	415	415
USP35	-0.204284	2.74899e-05	0.000211481	415	415
TMIE	-0.20426	2.75494e-05	0.000211777	415	394
FGFR3	-0.204253	2.75684e-05	0.000211843	415	414
C19orf44	-0.204225	2.76379e-05	0.000212297	415	415
MLYCD	-0.204153	2.78226e-05	0.000213553	415	415
CTNND2	-0.2041	2.79614e-05	0.000214433	415	386
LCN10	-0.204061	2.80615e-05	0.00021506	415	396
NCRNA00176	-0.204011	2.81905e-05	0.000215885	415	415
CAP2	-0.203853	2.86064e-05	0.000218821	415	415
POU6F2	-0.203846	2.86227e-05	0.000218864	415	273
TMEM35	-0.203748	2.8885e-05	0.000220673	415	399
CEL	-0.203745	2.88921e-05	0.000220673	415	412
TJAP1	-0.203588	2.93128e-05	0.000223717	415	415
ZBTB5	-0.203528	2.94747e-05	0.000224783	415	415
C22orf36	-0.203497	2.95614e-05	0.000225359	415	415
HLTF	-0.203473	2.96241e-05	0.000225753	415	415
PRAP1	-0.203445	2.97024e-05	0.000226264	415	406
LOC100128164	-0.203416	2.97803e-05	0.000226772	415	392
DHRS12	-0.20334	2.99907e-05	0.000228116	415	415
PARD3	-0.203307	3.00811e-05	0.000228718	415	415
C1QTNF1	-0.203277	3.01643e-05	0.000229179	415	415
BMP4	-0.203247	3.02478e-05	0.000229727	415	415
ESPN	-0.203217	3.03321e-05	0.00023028	415	414
MAOB	-0.20318	3.04355e-05	0.000230923	415	415
MORC2	-0.203179	3.04396e-05	0.000230923	415	415
AVPR2	-0.203049	3.08034e-05	0.000233534	415	411
KIAA0495	-0.203048	3.08069e-05	0.000233534	415	415
WNT9A	-0.203008	3.09207e-05	0.000234222	415	412
NR2F1	-0.202988	3.09769e-05	0.00023456	415	415
USP36	-0.202863	3.1336e-05	0.00023719	415	415
PDZD2	-0.202858	3.13497e-05	0.000237205	415	415
KIAA1274	-0.20284	3.14004e-05	0.0002375	415	415
PROC	-0.202787	3.15557e-05	0.000238585	415	412
TRIM39	-0.202766	3.16164e-05	0.000238954	415	415
C3orf15	-0.202725	3.17337e-05	0.000239662	415	399
PTPN21	-0.202651	3.19505e-05	0.000241119	415	415
C6orf225	-0.202625	3.20286e-05	0.000241618	415	415
CAMK2N1	-0.202601	3.20966e-05	0.000241951	415	415
CRAMP1L	-0.202579	3.21634e-05	0.000242364	415	415
KIF6	-0.20256	3.22177e-05	0.000242592	415	399
ESPNL	-0.202503	3.2389e-05	0.000243792	415	410
LAMC1	-0.20248	3.24562e-05	0.000244206	415	415
PRDM13	-0.202435	3.25914e-05	0.000244873	415	132
SALL4	-0.20241	3.26652e-05	0.000245141	415	414
LOC84931	-0.202397	3.27036e-05	0.000245338	415	217
LOC442421	-0.202372	3.27784e-05	0.000245717	415	389
OVGP1	-0.202343	3.28661e-05	0.000246113	415	415
KRT23	-0.202342	3.28678e-05	0.000246113	415	407
TTR	-0.202336	3.2888e-05	0.000246173	415	345
RNF123	-0.202267	3.3096e-05	0.000247547	415	415
ZNF727	-0.202249	3.31491e-05	0.000247853	415	373
AIFM3	-0.202221	3.32363e-05	0.000248321	415	413
SARM1	-0.202198	3.33062e-05	0.000248751	415	415
KCTD2	-0.202124	3.35308e-05	0.000250244	415	415
PPP1R3G	-0.202119	3.35458e-05	0.000250263	415	414
GABBR1	-0.202055	3.37428e-05	0.000251454	415	415
FAF1	-0.201833	3.44367e-05	0.000256154	415	415
TMEM117	-0.201819	3.44804e-05	0.000256355	415	415
F8A1	-0.201816	3.44892e-05	0.000256355	415	415
GLP1R	-0.201667	3.49627e-05	0.000259684	415	332
HILS1	-0.201631	3.50786e-05	0.000260354	415	201
ZNF498	-0.201549	3.534e-05	0.00026191	415	415
CSRNP3	-0.201521	3.54322e-05	0.000262464	415	406
DET1	-0.201518	3.54407e-05	0.000262464	415	415
GFOD1	-0.201448	3.56689e-05	0.000264057	415	415
MDH1B	-0.201317	3.60955e-05	0.000266922	415	403
PRKAB1	-0.201312	3.61131e-05	0.000266954	415	415
FLG	-0.201268	3.62592e-05	0.000267839	415	378
LIPI	-0.201188	3.65224e-05	0.000269521	415	200
POGK	-0.201183	3.65402e-05	0.000269521	415	415
NHLH2	-0.201126	3.67297e-05	0.000270622	415	226
PPM1E	-0.201102	3.68092e-05	0.000271109	415	412
PRDM5	-0.201081	3.68813e-05	0.000271517	415	414
NOL3	-0.201046	3.6998e-05	0.000272203	415	415
TTC15	-0.201041	3.70141e-05	0.000272222	415	415
FAM172A	-0.201011	3.71174e-05	0.000272882	415	415
VSTM2L	-0.200894	3.7513e-05	0.00027529	415	414
CSRP1	-0.200871	3.75928e-05	0.000275776	415	415
C3orf67	-0.200839	3.77038e-05	0.00027649	415	409
STAT5B	-0.200751	3.80048e-05	0.000278496	415	415
TMEM79	-0.200702	3.81757e-05	0.000279604	415	415
WNT6	-0.200692	3.82098e-05	0.000279604	415	404
ESPNP	-0.200687	3.82261e-05	0.000279604	415	338
DTNA	-0.20068	3.82529e-05	0.000279604	415	415
TBC1D17	-0.200647	3.83672e-05	0.000280237	415	415
C16orf58	-0.20057	3.8635e-05	0.000282091	415	415
ADAMTS19	-0.200566	3.86509e-05	0.000282106	415	223
CGREF1	-0.200528	3.87827e-05	0.000282942	415	415
ODF3L1	-0.200525	3.87935e-05	0.000282942	415	412
XPNPEP2	-0.200456	3.90363e-05	0.000284611	415	414
STIM1	-0.200422	3.91581e-05	0.000285292	415	415
SCGN	-0.200405	3.9217e-05	0.000285516	415	303
ZNF641	-0.200356	3.93923e-05	0.000286689	415	415
ZBTB22	-0.200351	3.94117e-05	0.000286728	415	415
RNF44	-0.200319	3.95269e-05	0.000287462	415	415
OGDH	-0.200247	3.97849e-05	0.000289131	415	415
TMEM61	-0.200223	3.98717e-05	0.000289657	415	400
PITX2	-0.200161	4.00959e-05	0.000290972	415	377
PROCA1	-0.200131	4.02035e-05	0.000291648	415	415
PRKAB2	-0.200084	4.0378e-05	0.000292754	415	415
CDH22	-0.199992	4.07129e-05	0.000294815	415	324
TMEM25	-0.199943	4.08943e-05	0.000295887	415	415
TMEM132C	-0.199937	4.0918e-05	0.000295887	415	360
BCL9L	-0.199923	4.09713e-05	0.00029605	415	415
ARMC2	-0.199909	4.10228e-05	0.000296316	415	415
CLSTN2	-0.199795	4.14455e-05	0.00029905	415	414
PCDHGC4	-0.199782	4.14962e-05	0.000299308	415	409
LY6G6C	-0.199778	4.15125e-05	0.000299319	415	393
LOC401431	-0.199764	4.15626e-05	0.000299574	415	415
EMID1	-0.199757	4.15899e-05	0.000299664	415	414
HNRNPUL1	-0.199744	4.16393e-05	0.000299913	415	415
MAGEE2	-0.199714	4.17527e-05	0.000300623	415	242
TPTE	-0.199676	4.18956e-05	0.000301544	415	222
YPEL1	-0.199656	4.19709e-05	0.000301979	415	415
CTSF	-0.199644	4.20173e-05	0.000302098	415	415
KLF15	-0.199596	4.21997e-05	0.000303193	415	410
R3HDM2	-0.199566	4.23126e-05	0.000303897	415	415
CPN1	-0.199536	4.2431e-05	0.000304639	415	167
NCDN	-0.199488	4.26147e-05	0.000305844	415	415
TM9SF4	-0.199484	4.26291e-05	0.000305844	415	415
FBXO10	-0.199451	4.27551e-05	0.00030653	415	415
DKKL1	-0.199356	4.31243e-05	0.000308857	415	305
P2RX2	-0.199352	4.3139e-05	0.000308857	415	321
KCNMB2	-0.199282	4.34117e-05	0.000310577	415	390
DVWA	-0.199159	4.38965e-05	0.00031327	415	348
WWOX	-0.199145	4.39545e-05	0.000313573	415	415
MORN1	-0.199133	4.40001e-05	0.000313788	415	415
STXBP1	-0.199086	4.41866e-05	0.000314807	415	415
SCN4B	-0.199034	4.43939e-05	0.00031615	415	415
RNF43	-0.198997	4.45429e-05	0.000316955	415	415
PSD	-0.198954	4.47155e-05	0.000317881	415	415
RAB3D	-0.198876	4.50307e-05	0.00031956	415	415
RECQL5	-0.198848	4.51463e-05	0.000320215	415	415
FAM179B	-0.198783	4.54107e-05	0.000321792	415	415
SCN3A	-0.19878	4.54248e-05	0.000321792	415	414
HCN1	-0.198727	4.56415e-05	0.000323214	415	269
COL21A1	-0.198671	4.58723e-05	0.000324621	415	412
TBX3	-0.198487	4.66359e-05	0.000329563	415	415
DOCK6	-0.198481	4.66608e-05	0.000329624	415	415
DTX3	-0.19845	4.67898e-05	0.000330305	415	415
LMO1	-0.198432	4.68656e-05	0.000330676	415	239
C8orf84	-0.19843	4.68751e-05	0.000330676	415	415
NFASC	-0.198418	4.6927e-05	0.000330927	415	415
C18orf18	-0.198393	4.70301e-05	0.000331539	415	415
IGF2AS	-0.198107	4.82551e-05	0.000339582	415	295
ZNF70	-0.198099	4.82891e-05	0.000339688	415	415
ZNF628	-0.198096	4.83037e-05	0.000339688	415	415
LOC92249	-0.198057	4.84729e-05	0.000340759	415	415
PDZD4	-0.198036	4.85645e-05	0.000341285	415	415
KRTAP3-3	-0.198025	4.8611e-05	0.000341493	415	81
WWTR1	-0.19802	4.86347e-05	0.00034154	415	415
DCP1B	-0.198009	4.86822e-05	0.000341755	415	415
TM4SF4	-0.197995	4.87402e-05	0.000341975	415	400
KRT33A	-0.197994	4.87473e-05	0.000341975	415	40
GPAA1	-0.197979	4.88133e-05	0.000342319	415	415
SLC6A8	-0.197935	4.90042e-05	0.00034342	415	415
GUCY1B2	-0.197907	4.91268e-05	0.000344041	415	383
SCUBE2	-0.197841	4.94205e-05	0.000345738	415	415
POM121C	-0.197822	4.95033e-05	0.000346198	415	415
C19orf45	-0.197812	4.95464e-05	0.000346305	415	397
DCX	-0.197782	4.96796e-05	0.000346831	415	378
PRRT1	-0.197769	4.97401e-05	0.000347134	415	415
OPRD1	-0.197705	5.0027e-05	0.000349016	415	211
OXR1	-0.197655	5.02503e-05	0.000350244	415	415
DLL3	-0.197634	5.03458e-05	0.000350635	415	360
TRPM6	-0.197457	5.11462e-05	0.000355719	415	409
NACC2	-0.197445	5.12031e-05	0.000355993	415	415
GPC1	-0.19734	5.16845e-05	0.000359093	415	415
PTK7	-0.197302	5.18637e-05	0.000360163	415	415
PPP2R3A	-0.197299	5.18742e-05	0.000360163	415	415
MPRIP	-0.197234	5.21755e-05	0.000362131	415	415
NES	-0.197174	5.24594e-05	0.000363852	415	415
NISCH	-0.197146	5.25905e-05	0.000364636	415	415
ZSCAN2	-0.197113	5.27465e-05	0.000365217	415	415
NEBL	-0.197108	5.27702e-05	0.000365256	415	415
GABRB2	-0.1971	5.28069e-05	0.000365385	415	387
AQP4	-0.197004	5.32592e-05	0.000368388	415	269
BEND5	-0.196981	5.33714e-05	0.000369038	415	412
RNF160	-0.196955	5.34927e-05	0.00036975	415	415
PAIP2B	-0.196891	5.37983e-05	0.000371736	415	415
FAM65A	-0.196837	5.40615e-05	0.000373299	415	415
IGSF10	-0.196801	5.42312e-05	0.000374175	415	411
FAM100A	-0.196772	5.4372e-05	0.000374932	415	415
C1orf95	-0.196678	5.48295e-05	0.000377958	415	396
KLF7	-0.196651	5.49623e-05	0.000378744	415	415
DPEP1	-0.196641	5.50095e-05	0.00037894	415	410
TENC1	-0.196617	5.51314e-05	0.000379521	415	415
TDGF1	-0.196517	5.56236e-05	0.000382518	415	401
ATG9A	-0.196444	5.59838e-05	0.000384734	415	415
LGR6	-0.196319	5.66093e-05	0.000388373	415	413
TEX2	-0.196188	5.72745e-05	0.000392537	415	415
FBXO9	-0.196153	5.74533e-05	0.000393629	415	415
EPB41L1	-0.196107	5.76895e-05	0.000395113	415	415
LOC100190940	-0.196086	5.77936e-05	0.000395692	415	285
PLK1S1	-0.196042	5.80234e-05	0.000396997	415	415
LIMS3-LOC440895	-0.196009	5.81941e-05	0.000397895	415	415
LOC100131193	-0.195886	5.88285e-05	0.000402098	415	415
PYGM	-0.195858	5.89771e-05	0.000402972	415	415
TRMT12	-0.195854	5.89962e-05	0.000402972	415	415
CMTM5	-0.195829	5.91269e-05	0.000403728	415	229
KCTD11	-0.195794	5.9314e-05	0.000404796	415	415
BFSP1	-0.195729	5.96547e-05	0.000406649	415	415
PRB3	-0.195729	5.96552e-05	0.000406649	415	296
LRFN2	-0.195674	5.99466e-05	0.000408497	415	300
C17orf70	-0.19565	6.0075e-05	0.000409234	415	415
GNAO1	-0.195605	6.03166e-05	0.000410663	415	415
FASN	-0.195603	6.03253e-05	0.000410663	415	415
DAAM2	-0.195597	6.03574e-05	0.000410743	415	415
MRGPRE	-0.195579	6.0454e-05	0.000411124	415	239
PCDHA13	-0.195536	6.06861e-05	0.000412564	415	277
SLC38A1	-0.195438	6.12138e-05	0.000416011	415	415
TPH1	-0.19543	6.12585e-05	0.000416036	415	378
FTO	-0.195254	6.22195e-05	0.000422137	415	415
HSD11B1L	-0.195203	6.25013e-05	0.000423765	415	415
FNDC8	-0.195169	6.26899e-05	0.000424758	415	411
DUSP23	-0.19512	6.29583e-05	0.000426291	415	415
USP49	-0.195089	6.31343e-05	0.000427197	415	415
FAM184B	-0.195042	6.33951e-05	0.000428818	415	232
RAB11FIP5	-0.195035	6.34346e-05	0.000428942	415	415
RC3H1	-0.194988	6.37009e-05	0.00043046	415	415
NDP	-0.194923	6.40648e-05	0.00043248	415	379
LOC100289341	-0.194841	6.45299e-05	0.00043533	415	415
ACADL	-0.19483	6.45943e-05	0.000435619	415	352
WBSCR17	-0.194783	6.48636e-05	0.000437103	415	412
NDST1	-0.194775	6.49079e-05	0.00043715	415	415
TRIM67	-0.194726	6.51892e-05	0.000438899	415	409
DUSP18	-0.194711	6.52756e-05	0.00043919	415	415
HES3	-0.194711	6.5276e-05	0.00043919	415	30
NEK3	-0.194578	6.60457e-05	0.000444074	415	415
WNT4	-0.194553	6.61898e-05	0.000444599	415	415
FLJ13197	-0.19451	6.64436e-05	0.000446156	415	415
RTDR1	-0.194492	6.65489e-05	0.000446566	415	388
EPM2AIP1	-0.194403	6.70731e-05	0.000449935	415	415
WFDC2	-0.194384	6.71817e-05	0.000450514	415	405
ST8SIA3	-0.194351	6.73825e-05	0.00045171	415	270
FNDC5	-0.194261	6.79172e-05	0.000454843	415	413
NMBR	-0.19423	6.8101e-05	0.00045569	415	201
MLL2	-0.194228	6.81113e-05	0.00045569	415	415
FAM193B	-0.194184	6.83765e-05	0.000457011	415	415
RBM15B	-0.194173	6.84463e-05	0.000457326	415	415
FGFR1	-0.194141	6.86389e-05	0.000458462	415	415
LOC100126784	-0.194119	6.87681e-05	0.000459173	415	415
RGS7	-0.194115	6.87915e-05	0.000459178	415	326
SLC13A5	-0.194092	6.89318e-05	0.000459962	415	361
CCDC122	-0.194014	6.94063e-05	0.000462823	415	415
TAC4	-0.193992	6.95422e-05	0.00046349	415	316
KIF7	-0.19399	6.95521e-05	0.00046349	415	415
CLCNKA	-0.19398	6.96154e-05	0.000463759	415	232
KANK2	-0.193945	6.9831e-05	0.000465042	415	415
PAK7	-0.193924	6.99614e-05	0.000465757	415	303
SLC18A3	-0.193809	7.06664e-05	0.000469677	415	215
PCDHAC1	-0.193781	7.08416e-05	0.000470687	415	372
LOC728190	-0.193673	7.15177e-05	0.000475023	415	415
ABCC6	-0.193662	7.15883e-05	0.000475336	415	415
SERPINA12	-0.193626	7.18152e-05	0.00047653	415	101
LBX1	-0.193572	7.21546e-05	0.000478468	415	79
FAM178B	-0.193545	7.23268e-05	0.000479452	415	382
FBRSL1	-0.193539	7.23633e-05	0.000479537	415	415
C1orf69	-0.193506	7.25753e-05	0.000480785	415	415
WDR27	-0.193487	7.26958e-05	0.000481425	415	415
NCOA5	-0.193424	7.30984e-05	0.000483775	415	415
CRMP1	-0.193355	7.35394e-05	0.000486216	415	415
DNHD1	-0.193341	7.36273e-05	0.000486638	415	415
SYT5	-0.193308	7.38449e-05	0.000487917	415	397
FBXO32	-0.193285	7.3993e-05	0.000488576	415	415
SLC26A1	-0.193181	7.46681e-05	0.00049239	415	415
LOC90110	-0.193125	7.50369e-05	0.000494339	415	415
TPCN1	-0.193036	7.56232e-05	0.000497877	415	415
STON2	-0.192985	7.59616e-05	0.000499943	415	415
RHBG	-0.192949	7.61976e-05	0.00050117	415	319
HOXB5	-0.192915	7.64287e-05	0.000502526	415	415
PCDHB5	-0.192871	7.67202e-05	0.000504279	415	414
SERPINF2	-0.192857	7.68112e-05	0.000504713	415	415
C2CD4C	-0.192837	7.69486e-05	0.000505451	415	414
LRRC49	-0.192793	7.72478e-05	0.000507087	415	414
AUTS2	-0.192719	7.7748e-05	0.000509709	415	415
ITGB1BP2	-0.192705	7.78399e-05	0.000510147	415	407
C10orf41	-0.192701	7.787e-05	0.000510179	415	415
CDC42BPB	-0.192639	7.82903e-05	0.0005126	415	415
PRUNE	-0.19263	7.83543e-05	0.000512853	415	415
ADCY6	-0.192611	7.84801e-05	0.00051351	415	415
ZNF572	-0.192607	7.85128e-05	0.000513558	415	415
C13orf36	-0.192573	7.87399e-05	0.000514544	415	199
RAPGEFL1	-0.192478	7.93986e-05	0.000518681	415	415
ENGASE	-0.192468	7.94704e-05	0.000518982	415	415
RAD52	-0.19245	7.95911e-05	0.000519603	415	415
KRTAP4-1	-0.192446	7.96179e-05	0.00051961	415	245
LGALS7B	-0.192423	7.97787e-05	0.000520324	415	327
NOG	-0.19238	8.00771e-05	0.000522102	415	397
HGS	-0.192371	8.01454e-05	0.000522378	415	415
STK40	-0.192364	8.01887e-05	0.000522492	415	415
KCNQ4	-0.192281	8.07739e-05	0.000525628	415	405
PHYHIPL	-0.192226	8.1161e-05	0.000527977	415	408
PTPN14	-0.192221	8.11992e-05	0.000528056	415	415
ATL2	-0.192023	8.26113e-05	0.000536721	415	415
LOC654342	-0.192008	8.27151e-05	0.00053705	415	415
ZNF333	-0.192003	8.27533e-05	0.000537053	415	415
COL2A1	-0.192001	8.27686e-05	0.000537053	415	264
WLS	-0.191954	8.31049e-05	0.00053889	415	415
ZNF785	-0.191936	8.32378e-05	0.000539496	415	415
RIMS2	-0.191927	8.33028e-05	0.000539654	415	362
DLGAP3	-0.191897	8.35176e-05	0.000540872	415	415
HOXD4	-0.191893	8.3552e-05	0.000540922	415	407
TNFRSF11B	-0.191883	8.36181e-05	0.000541176	415	415
ZNF423	-0.191861	8.3782e-05	0.000541891	415	415
ZNF821	-0.191834	8.39751e-05	0.000542965	415	415
MAPK8IP3	-0.191825	8.40426e-05	0.000543228	415	415
NRXN3	-0.191812	8.41395e-05	0.000543507	415	415
SUGT1P1	-0.191799	8.42376e-05	0.000543944	415	342
IGF2	-0.191758	8.45367e-05	0.000545029	415	415
HOXC13	-0.191732	8.47234e-05	0.000546059	415	336
RNF208	-0.191692	8.50177e-05	0.000547781	415	415
IRGQ	-0.191651	8.53213e-05	0.000549341	415	415
SLC46A1	-0.191646	8.53606e-05	0.000549341	415	415
HSF1	-0.191626	8.55071e-05	0.000550058	415	415
C4orf44	-0.191598	8.57163e-05	0.000550723	415	406
ZNF772	-0.191596	8.57306e-05	0.000550723	415	415
DAAM1	-0.191509	8.63823e-05	0.000554423	415	415
SFRS13B	-0.191506	8.64049e-05	0.000554423	415	414
SERPINA10	-0.191426	8.70107e-05	0.000557955	415	295
LOC92659	-0.191369	8.74407e-05	0.000559899	415	415
TRIM45	-0.191367	8.74522e-05	0.000559899	415	415
IL17D	-0.19131	8.7886e-05	0.00056232	415	415
PPP1R1A	-0.191215	8.86138e-05	0.000566619	415	380
CCNJL	-0.191211	8.86472e-05	0.000566653	415	414
B3GNT8	-0.191201	8.87245e-05	0.000566968	415	415
DNALI1	-0.191137	8.92127e-05	0.000569907	415	415
PACRG	-0.191125	8.93109e-05	0.000570354	415	383
TSPAN7	-0.191069	8.97407e-05	0.000572738	415	415
SLC1A7	-0.191058	8.98237e-05	0.000572921	415	411
ADCY2	-0.191058	8.9826e-05	0.000572921	415	410
OPHN1	-0.191048	8.99056e-05	0.000573247	415	415
RALGAPB	-0.190965	9.05501e-05	0.000576811	415	415
CYP2W1	-0.190952	9.06546e-05	0.000577295	415	410
WNT3	-0.190864	9.13519e-05	0.000581552	415	409
LOC100270804	-0.190854	9.14297e-05	0.000581864	415	414
C15orf59	-0.190844	9.15049e-05	0.000581977	415	412
DBF4B	-0.190784	9.19822e-05	0.000584645	415	415
RAI2	-0.190768	9.21094e-05	0.000585269	415	415
MAP3K10	-0.190712	9.25563e-05	0.00058774	415	415
PRDM2	-0.190654	9.30248e-05	0.000590344	415	415
SLC25A21	-0.190623	9.3275e-05	0.000591561	415	364
CACNA1H	-0.190585	9.35764e-05	0.0005931	415	415
MEPCE	-0.190564	9.37447e-05	0.000593795	415	415
TP53BP2	-0.190556	9.38123e-05	0.000594037	415	415
DDAH2	-0.190538	9.39594e-05	0.000594782	415	415
LOC389332	-0.190506	9.4216e-05	0.000596034	415	386
PNPLA7	-0.190405	9.50415e-05	0.000600692	415	415
TEAD2	-0.19036	9.54134e-05	0.000602854	415	415
ZBTB45	-0.190239	9.64187e-05	0.000608446	415	415
B4GALT6	-0.190234	9.64556e-05	0.000608489	415	415
TAC1	-0.19021	9.66572e-05	0.000609417	415	248
PGAP1	-0.190209	9.66631e-05	0.000609417	415	415
WNK1	-0.190196	9.6772e-05	0.000609914	415	415
CORO6	-0.190154	9.71237e-05	0.000611559	415	414
ADCY8	-0.190107	9.75188e-05	0.000613664	415	125
VWCE	-0.190022	9.82347e-05	0.000617401	415	414
CHIC1	-0.189997	9.84473e-05	0.000618161	415	415
B3GALNT2	-0.189985	9.85445e-05	0.000618579	415	415
SNORD116-4	-0.189926	9.9053e-05	0.000621578	415	338
PCDHGB1	-0.189888	9.93742e-05	0.000623014	415	410
C6orf41	-0.189703	0.000100972	0.000632054	415	351
DLL1	-0.189686	0.00010112	0.000632712	415	415
ATP6V0A1	-0.189682	0.000101152	0.000632712	415	415
LOC643763	-0.189669	0.000101265	0.000632712	415	360
C13orf23	-0.189641	0.00010151	0.000634044	415	415
MYLIP	-0.189635	0.000101558	0.000634149	415	415
CRY2	-0.189617	0.000101719	0.00063496	415	415
DIS3L2	-0.189562	0.000102204	0.000637201	415	415
VMAC	-0.189555	0.000102264	0.000637377	415	415
GNA12	-0.189443	0.000103252	0.000642742	415	415
ZNF629	-0.189411	0.00010353	0.000644277	415	415
CC2D2A	-0.189318	0.000104365	0.000648872	415	415
ANKRD40	-0.189311	0.000104424	0.000649042	415	415
PLCG1	-0.189275	0.000104754	0.000650888	415	415
CYP2B6	-0.189258	0.000104903	0.000651615	415	403
WBP1	-0.189196	0.000105462	0.000654885	415	415
EPHA7	-0.189126	0.000106098	0.000658636	415	406
NBPF6	-0.189114	0.00010621	0.000659126	415	99
CRYM	-0.189088	0.000106446	0.00066039	415	399
PPP1R3F	-0.189074	0.000106574	0.000660978	415	415
ATP11A	-0.189056	0.000106733	0.000661766	415	415
JMY	-0.189041	0.000106873	0.000662431	415	415
TRIM71	-0.188992	0.000107327	0.000664834	415	230
KCNK9	-0.18897	0.000107522	0.000665839	415	407
ADNP	-0.188948	0.000107731	0.000666929	415	415
FBXW4	-0.188912	0.000108063	0.000668691	415	415
HUWE1	-0.188906	0.000108115	0.000668691	415	415
BICD2	-0.188878	0.000108377	0.000669699	415	415
ZNF507	-0.188856	0.000108585	0.00067078	415	415
TCEAL1	-0.188816	0.00010895	0.000672622	415	415
CSPG4	-0.188752	0.000109556	0.000675574	415	415
SATB1	-0.188661	0.000110411	0.000680189	415	415
DKK4	-0.188643	0.000110574	0.000680987	415	288
CSRP2BP	-0.188628	0.000110718	0.000681667	415	415
CMYA5	-0.188577	0.000111207	0.000684466	415	415
ZNF614	-0.188533	0.000111619	0.000686585	415	415
AOX1	-0.188499	0.000111945	0.000688382	415	413
USP30	-0.188366	0.000113228	0.000695848	415	415
KBTBD6	-0.188303	0.000113837	0.000699377	415	415
AR	-0.188283	0.000114033	0.000700367	415	407
PDZD7	-0.188262	0.000114237	0.000701407	415	410
EFHC2	-0.188204	0.000114802	0.000704663	415	406
PEG3	-0.188188	0.000114961	0.000705429	415	415
ESYT3	-0.188103	0.000115799	0.000709343	415	405
SPTBN5	-0.188102	0.00011581	0.000709343	415	415
DIP2C	-0.188076	0.000116067	0.000710701	415	415
ZKSCAN1	-0.18799	0.000116918	0.000715263	415	415
KLRG2	-0.187987	0.000116954	0.000715267	415	314
SLC25A26	-0.187982	0.000117001	0.000715339	415	415
AMOT	-0.187964	0.000117176	0.000716195	415	415
TECTA	-0.18792	0.000117618	0.000718581	415	404
LOC151162	-0.187918	0.000117638	0.000718581	415	415
DPY19L2P1	-0.187907	0.000117746	0.000719023	415	300
LIMS2	-0.187887	0.000117949	0.000720051	415	415
CNTNAP2	-0.187873	0.000118091	0.000720699	415	411
CCDC103	-0.187778	0.000119047	0.000726043	415	415
RNASEH2C	-0.187776	0.000119075	0.000726043	415	415
PLXNA2	-0.187757	0.000119264	0.000726981	415	415
LOC100271836	-0.187743	0.000119401	0.000727595	415	415
HIST4H4	-0.187712	0.000119719	0.000729312	415	415
GABRA4	-0.187645	0.000120401	0.000733028	415	325
IRS4	-0.187642	0.00012044	0.000733044	415	245
FLJ33360	-0.18763	0.00012056	0.00073355	415	334
ARID1A	-0.187561	0.000121271	0.00073721	415	415
OSBPL6	-0.187497	0.000121933	0.000740572	415	415
CLU	-0.187491	0.000121998	0.000740572	415	415
SNAP91	-0.187442	0.000122505	0.000743151	415	324
NBPF4	-0.187408	0.000122851	0.000744805	415	290
TET3	-0.187388	0.000123067	0.000745891	415	415
FABP12	-0.18737	0.000123253	0.000746566	415	38
TCP10L2	-0.187322	0.000123754	0.000749152	415	242
PEX6	-0.18731	0.000123889	0.000749747	415	415
KCTD15	-0.187306	0.000123929	0.000749765	415	415
SCRIB	-0.18723	0.000124725	0.000754129	415	415
JMJD7-PLA2G4B	-0.187219	0.000124846	0.000754634	415	415
FAM78B	-0.187131	0.000125781	0.000759557	415	415
PFKM	-0.187123	0.000125867	0.000759674	415	415
C15orf37	-0.187022	0.000126954	0.000764866	415	415
GPSM1	-0.186988	0.000127321	0.000766618	415	415
TCEA3	-0.186979	0.000127409	0.00076682	415	414
LOC100133985	-0.186977	0.00012743	0.00076682	415	414
KCNQ1OT1	-0.186971	0.000127496	0.000766987	415	415
CHST9	-0.186966	0.00012755	0.000767027	415	338
FAM19A4	-0.186949	0.000127737	0.000767752	415	259
SEMA4C	-0.186928	0.000127966	0.000768896	415	415
CDHR3	-0.186916	0.0001281	0.000769249	415	413
PCDHGA2	-0.186907	0.000128196	0.000769595	415	413
IP6K1	-0.186895	0.00012832	0.000770103	415	415
MMP21	-0.186892	0.000128357	0.000770103	415	280
OBSCN	-0.186883	0.00012845	0.000770301	415	415
CARNS1	-0.186856	0.000128745	0.000771745	415	415
FBXO17	-0.186796	0.00012941	0.000774812	415	415
AKT2	-0.18673	0.000130129	0.000778616	415	415
DMD	-0.186718	0.000130266	0.000779016	415	415
ZMYM2	-0.186547	0.000132157	0.000789625	415	415
VLDLR	-0.186531	0.000132341	0.000790474	415	415
LOC100132247	-0.186528	0.000132378	0.000790474	415	415
DYNC2H1	-0.186499	0.000132698	0.000791919	415	415
LCMT2	-0.186468	0.000133045	0.00079356	415	415
VPS37C	-0.186467	0.000133057	0.00079356	415	415
NAALAD2	-0.186456	0.000133183	0.000793877	415	415
MYST1	-0.186419	0.000133599	0.000795417	415	415
LRRC29	-0.186381	0.000134028	0.000797506	415	415
CACNA1G	-0.186376	0.000134091	0.000797644	415	385
PPDPF	-0.186305	0.000134897	0.000801968	415	415
GPM6B	-0.186293	0.000135036	0.000802322	415	415
PTPRF	-0.186231	0.00013574	0.000806034	415	415
GRIN2A	-0.186214	0.00013594	0.000806981	415	408
MYO15A	-0.186203	0.000136057	0.000807437	415	410
FAM150B	-0.18616	0.000136555	0.000809921	415	385
KRBA2	-0.186155	0.000136614	0.000810034	415	415
NKIRAS2	-0.186151	0.000136659	0.000810064	415	415
MST1P9	-0.18612	0.000137014	0.000811807	415	413
FOXK2	-0.186115	0.000137074	0.000811807	415	415
ATRNL1	-0.186108	0.000137155	0.000812049	415	399
ZNF187	-0.186079	0.000137495	0.000813823	415	415
LRTOMT	-0.186013	0.00013826	0.000817872	415	415
FAM83D	-0.185979	0.000138653	0.000819961	415	415
EFS	-0.185917	0.000139388	0.000823821	415	415
TMEM178	-0.18591	0.000139468	0.000824058	415	414
ZNF662	-0.185904	0.000139541	0.000824248	415	414
SNAR-G1	-0.185844	0.000140251	0.000828195	415	69
ADARB2	-0.185775	0.000141063	0.000832747	415	359
ZNF707	-0.185713	0.000141801	0.000836863	415	415
CHAD	-0.185658	0.000142465	0.000840288	415	410
KLF14	-0.185653	0.000142517	0.000840353	415	256
ZNF574	-0.185487	0.000144527	0.000851461	415	415
KIF12	-0.185469	0.000144745	0.000852246	415	413
DPY19L2	-0.185423	0.000145314	0.000855098	415	414
SYT1	-0.185398	0.00014561	0.000856494	415	411
PRR4	-0.18532	0.000146571	0.000861245	415	415
PCYT1B	-0.185306	0.00014674	0.000861983	415	398
HAP1	-0.185294	0.00014689	0.000862613	415	408
NCRNA00174	-0.185057	0.000149851	0.000878872	415	415
MIPOL1	-0.185055	0.000149875	0.000878872	415	414
GJB1	-0.185019	0.000150322	0.000881234	415	414
TP53TG3B	-0.184964	0.000151018	0.000884802	415	202
HCRTR1	-0.18495	0.000151202	0.000885393	415	282
ATP1B2	-0.184949	0.000151206	0.000885393	415	415
LRRC36	-0.184946	0.000151256	0.000885426	415	406
TRAF5	-0.184935	0.000151394	0.00088598	415	415
TDGF3	-0.184908	0.000151734	0.000887455	415	375
SOX6	-0.184862	0.000152319	0.000890557	415	415
PTPN13	-0.184859	0.000152352	0.000890557	415	415
BCOR	-0.184848	0.000152493	0.000891123	415	415
GPR12	-0.184821	0.000152838	0.000892877	415	200
C11orf70	-0.184744	0.000153836	0.000897675	415	409
PKLR	-0.184735	0.000153953	0.000897932	415	334
KHDC1	-0.184731	0.000153999	0.000897932	415	411
ZSCAN21	-0.18473	0.000154016	0.000897932	415	415
STOX2	-0.18472	0.000154138	0.000897932	415	414
SNX33	-0.18472	0.000154147	0.000897932	415	415
UBR5	-0.184715	0.000154203	0.000898	415	415
PHLPP1	-0.1847	0.000154396	0.000898771	415	415
SLC5A9	-0.184698	0.000154426	0.000898771	415	410
CENPB	-0.184685	0.000154602	0.000899287	415	415
D4S234E	-0.184648	0.000155081	0.000901818	415	415
GPR75	-0.184626	0.000155364	0.000903202	415	415
CYHR1	-0.184609	0.000155588	0.000904246	415	415
WASF2	-0.184494	0.00015709	0.000912527	415	415
NEURL	-0.184493	0.000157104	0.000912527	415	415
C1orf114	-0.184484	0.000157219	0.000912936	415	405
CA14	-0.184451	0.000157655	0.000915203	415	413
SVOP	-0.184346	0.000159051	0.000922515	415	317
CLDN19	-0.184306	0.000159573	0.000925278	415	341
ORAI3	-0.184244	0.000160403	0.000929498	415	415
SLC5A7	-0.184231	0.000160589	0.000930102	415	295
EPHX3	-0.184183	0.000161232	0.000933022	415	415
NFIA	-0.18414	0.000161809	0.000935394	415	415
LOC283267	-0.184139	0.000161827	0.000935394	415	415
SMPX	-0.184134	0.000161887	0.000935477	415	291
NR0B2	-0.184121	0.000162062	0.000936218	415	406
CHD8	-0.184088	0.00016251	0.000938538	415	415
SPRED2	-0.18407	0.000162763	0.000939466	415	415
FEV	-0.184064	0.000162844	0.000939664	415	337
GPR27	-0.183956	0.000164318	0.000947532	415	389
LIX1	-0.183954	0.000164348	0.000947532	415	343
CCKBR	-0.18394	0.000164539	0.00094836	415	329
STARD13	-0.1839	0.00016509	0.000950997	415	415
TBC1D13	-0.183864	0.000165588	0.000953593	415	415
ZNF76	-0.183853	0.000165735	0.000953898	415	415
RAB11FIP2	-0.183828	0.000166075	0.000955578	415	415
PCDHB6	-0.183748	0.000167199	0.000961225	415	414
LUZP2	-0.183737	0.000167347	0.000961803	415	391
FLG2	-0.183725	0.000167516	0.000962504	415	209
GABBR2	-0.183706	0.000167781	0.000963754	415	390
ITFG2	-0.18368	0.000168149	0.000965316	415	415
C17orf80	-0.183647	0.000168605	0.000967662	415	415
ADCYAP1R1	-0.183606	0.000169186	0.000970722	415	214
LRRIQ1	-0.183576	0.000169611	0.000972883	415	360
KCNG3	-0.183523	0.00017035	0.000976566	415	367
PCDHA4	-0.183509	0.000170556	0.000977469	415	373
ATXN1L	-0.183502	0.000170653	0.000977751	415	415
PGM5P2	-0.183487	0.000170874	0.000978741	415	387
ANKS3	-0.183478	0.000170997	0.000979167	415	415
MAPK14	-0.183396	0.000172174	0.000985349	415	415
FAM66E	-0.183363	0.000172634	0.000987703	415	267
TRIM13	-0.18335	0.000172827	0.000988526	415	415
KIAA1409	-0.183253	0.000174229	0.000996063	415	405
SERPIND1	-0.183249	0.000174293	0.000996063	415	404
LMX1B	-0.183221	0.000174696	0.000998086	415	383
DLG2	-0.183147	0.000175769	0.00100365	415	412
SPHK2	-0.183129	0.000176032	0.00100487	415	415
BAIAP3	-0.183124	0.000176101	0.00100498	415	415
MOAP1	-0.183105	0.00017638	0.00100597	415	415
TGFBRAP1	-0.183039	0.00017736	0.00101017	415	415
C1orf126	-0.182959	0.000178541	0.00101661	415	415
C6orf195	-0.182893	0.000179512	0.0010207	415	301
SNX21	-0.182867	0.000179903	0.00102235	415	415
FXYD1	-0.182815	0.00018068	0.00102648	415	409
SLC35F1	-0.182753	0.000181612	0.00103119	415	414
TIGD5	-0.182744	0.000181746	0.00103166	415	415
DPP6	-0.18267	0.000182868	0.00103745	415	358
IFFO2	-0.182656	0.000183083	0.00103838	415	415
FAM5B	-0.182642	0.000183303	0.00103919	415	270
FGF10	-0.18264	0.00018333	0.00103919	415	346
DYNC1I1	-0.182628	0.000183508	0.00103991	415	414
BREA2	-0.182606	0.000183845	0.00104153	415	390
LOC400027	-0.182598	0.00018396	0.00104189	415	415
AKAP8L	-0.18259	0.00018409	0.00104234	415	415
TGFBR3	-0.182585	0.000184162	0.00104245	415	415
PLXNA4	-0.182579	0.000184254	0.00104268	415	415
MLXIPL	-0.182548	0.000184723	0.00104504	415	414
ZAK	-0.182535	0.000184922	0.0010456	415	415
IFT172	-0.182511	0.0001853	0.00104743	415	415
DSCR6	-0.182414	0.000186793	0.00105528	415	367
STK11IP	-0.182371	0.00018746	0.00105845	415	415
ZKSCAN4	-0.182364	0.000187565	0.00105875	415	415
PLEKHG5	-0.182353	0.000187743	0.00105946	415	415
EDC4	-0.18233	0.000188096	0.00106116	415	415
SCNN1A	-0.182305	0.000188486	0.00106306	415	415
HPN	-0.182295	0.000188641	0.00106364	415	398
ZXDA	-0.182254	0.000189278	0.00106651	415	414
TBX6	-0.182252	0.000189309	0.00106651	415	415
C1orf229	-0.182227	0.000189701	0.00106812	415	395
MYO18A	-0.182152	0.000190885	0.00107449	415	415
DMRTA1	-0.182102	0.000191673	0.00107802	415	379
SH3PXD2A	-0.182091	0.000191856	0.00107876	415	415
ZNF580	-0.182054	0.000192439	0.00108174	415	415
CRLF1	-0.182011	0.000193125	0.00108499	415	406
SRRM2	-0.181999	0.00019331	0.00108546	415	415
BACE1	-0.181982	0.000193584	0.00108666	415	415
SLC30A10	-0.181945	0.000194177	0.00108969	415	338
KIAA0232	-0.181922	0.000194552	0.00109118	415	415
CLDN3	-0.181848	0.000195747	0.00109748	415	414
LRRC47	-0.181756	0.000197237	0.00110527	415	415
PCMTD2	-0.181684	0.000198406	0.00111108	415	415
HSPB8	-0.181683	0.000198428	0.00111108	415	415
RBM9	-0.181647	0.00019902	0.00111408	415	415
BTBD11	-0.181559	0.000200457	0.00112088	415	415
C6orf122	-0.181518	0.000201147	0.0011235	415	413
TCP10	-0.181469	0.000201962	0.00112681	415	232
GAS2	-0.181426	0.000202665	0.00113042	415	415
ATP6V1G2	-0.181343	0.000204065	0.00113729	415	414
SYDE2	-0.181338	0.000204142	0.0011374	415	415
HSPB6	-0.18125	0.000205625	0.00114503	415	415
IPO9	-0.181236	0.000205872	0.00114609	415	415
EPHX4	-0.181193	0.000206606	0.00114955	415	413
ZNF777	-0.181168	0.000207022	0.00115155	415	415
C20orf177	-0.181163	0.000207112	0.00115173	415	415
GRIK2	-0.181148	0.00020736	0.00115279	415	380
WTIP	-0.181074	0.000208635	0.00115895	415	415
UBE2D4	-0.18107	0.000208697	0.00115895	415	415
CDIPT	-0.181051	0.000209023	0.00115929	415	415
SLC39A5	-0.18105	0.000209044	0.00115929	415	411
NR2F2	-0.180994	0.000210005	0.0011643	415	415
C10orf82	-0.180946	0.000210836	0.00116827	415	311
C4orf38	-0.180899	0.000211653	0.0011715	415	406
CAD	-0.180807	0.00021325	0.00117938	415	415
GPR157	-0.180764	0.000214008	0.00118292	415	415
KRT32	-0.18076	0.000214077	0.00118298	415	110
ZNF778	-0.18075	0.000214257	0.00118365	415	415
RAI1	-0.180698	0.000215174	0.00118782	415	415
HCN2	-0.180697	0.000215189	0.00118782	415	415
CHST10	-0.180661	0.000215828	0.00119103	415	415
H2AFY2	-0.180606	0.000216805	0.00119577	415	415
MAP1B	-0.180562	0.000217596	0.00119948	415	415
ZNF649	-0.180556	0.000217702	0.00119973	415	415
TUBGCP3	-0.180529	0.000218173	0.00120168	415	415
NANOS1	-0.180516	0.000218402	0.00120228	415	415
MAGED2	-0.180502	0.000218658	0.00120336	415	415
SMYD5	-0.180492	0.000218845	0.00120406	415	415
CUL7	-0.180473	0.000219174	0.0012047	415	415
YBX2	-0.180443	0.000219718	0.00120657	415	406
CAPN13	-0.180398	0.000220527	0.00121068	415	389
FAM188B	-0.180373	0.000220981	0.00121285	415	415
PTCD1	-0.18036	0.000221216	0.00121381	415	415
ISPD	-0.180313	0.000222066	0.00121781	415	415
RALGAPA1	-0.180273	0.000222798	0.00122116	415	415
NOS1AP	-0.180242	0.000223365	0.00122361	415	415
UMODL1	-0.180195	0.00022423	0.00122801	415	334
MSTO2P	-0.180191	0.000224302	0.00122808	415	415
HMP19	-0.180187	0.000224371	0.00122812	415	349
TMEM189	-0.180163	0.000224809	0.00123019	415	415
LOC441869	-0.180067	0.000226586	0.00123899	415	415
ZNF592	-0.180064	0.000226643	0.00123899	415	415
SPTBN4	-0.180063	0.000226663	0.00123899	415	414
PYY	-0.180057	0.000226778	0.00123928	415	246
GPR20	-0.180045	0.000226999	0.00124016	415	411
URB1	-0.180003	0.000227776	0.00124373	415	415
ZKSCAN2	-0.179969	0.000228418	0.00124686	415	415
ANKRD57	-0.179932	0.00022911	0.0012492	415	415
EML1	-0.17993	0.000229136	0.0012492	415	415
[truncated: 18,227 more rows]
